# Supplementary material
Source: PubMed Central journal article supplement (PMC6111164)

**A**

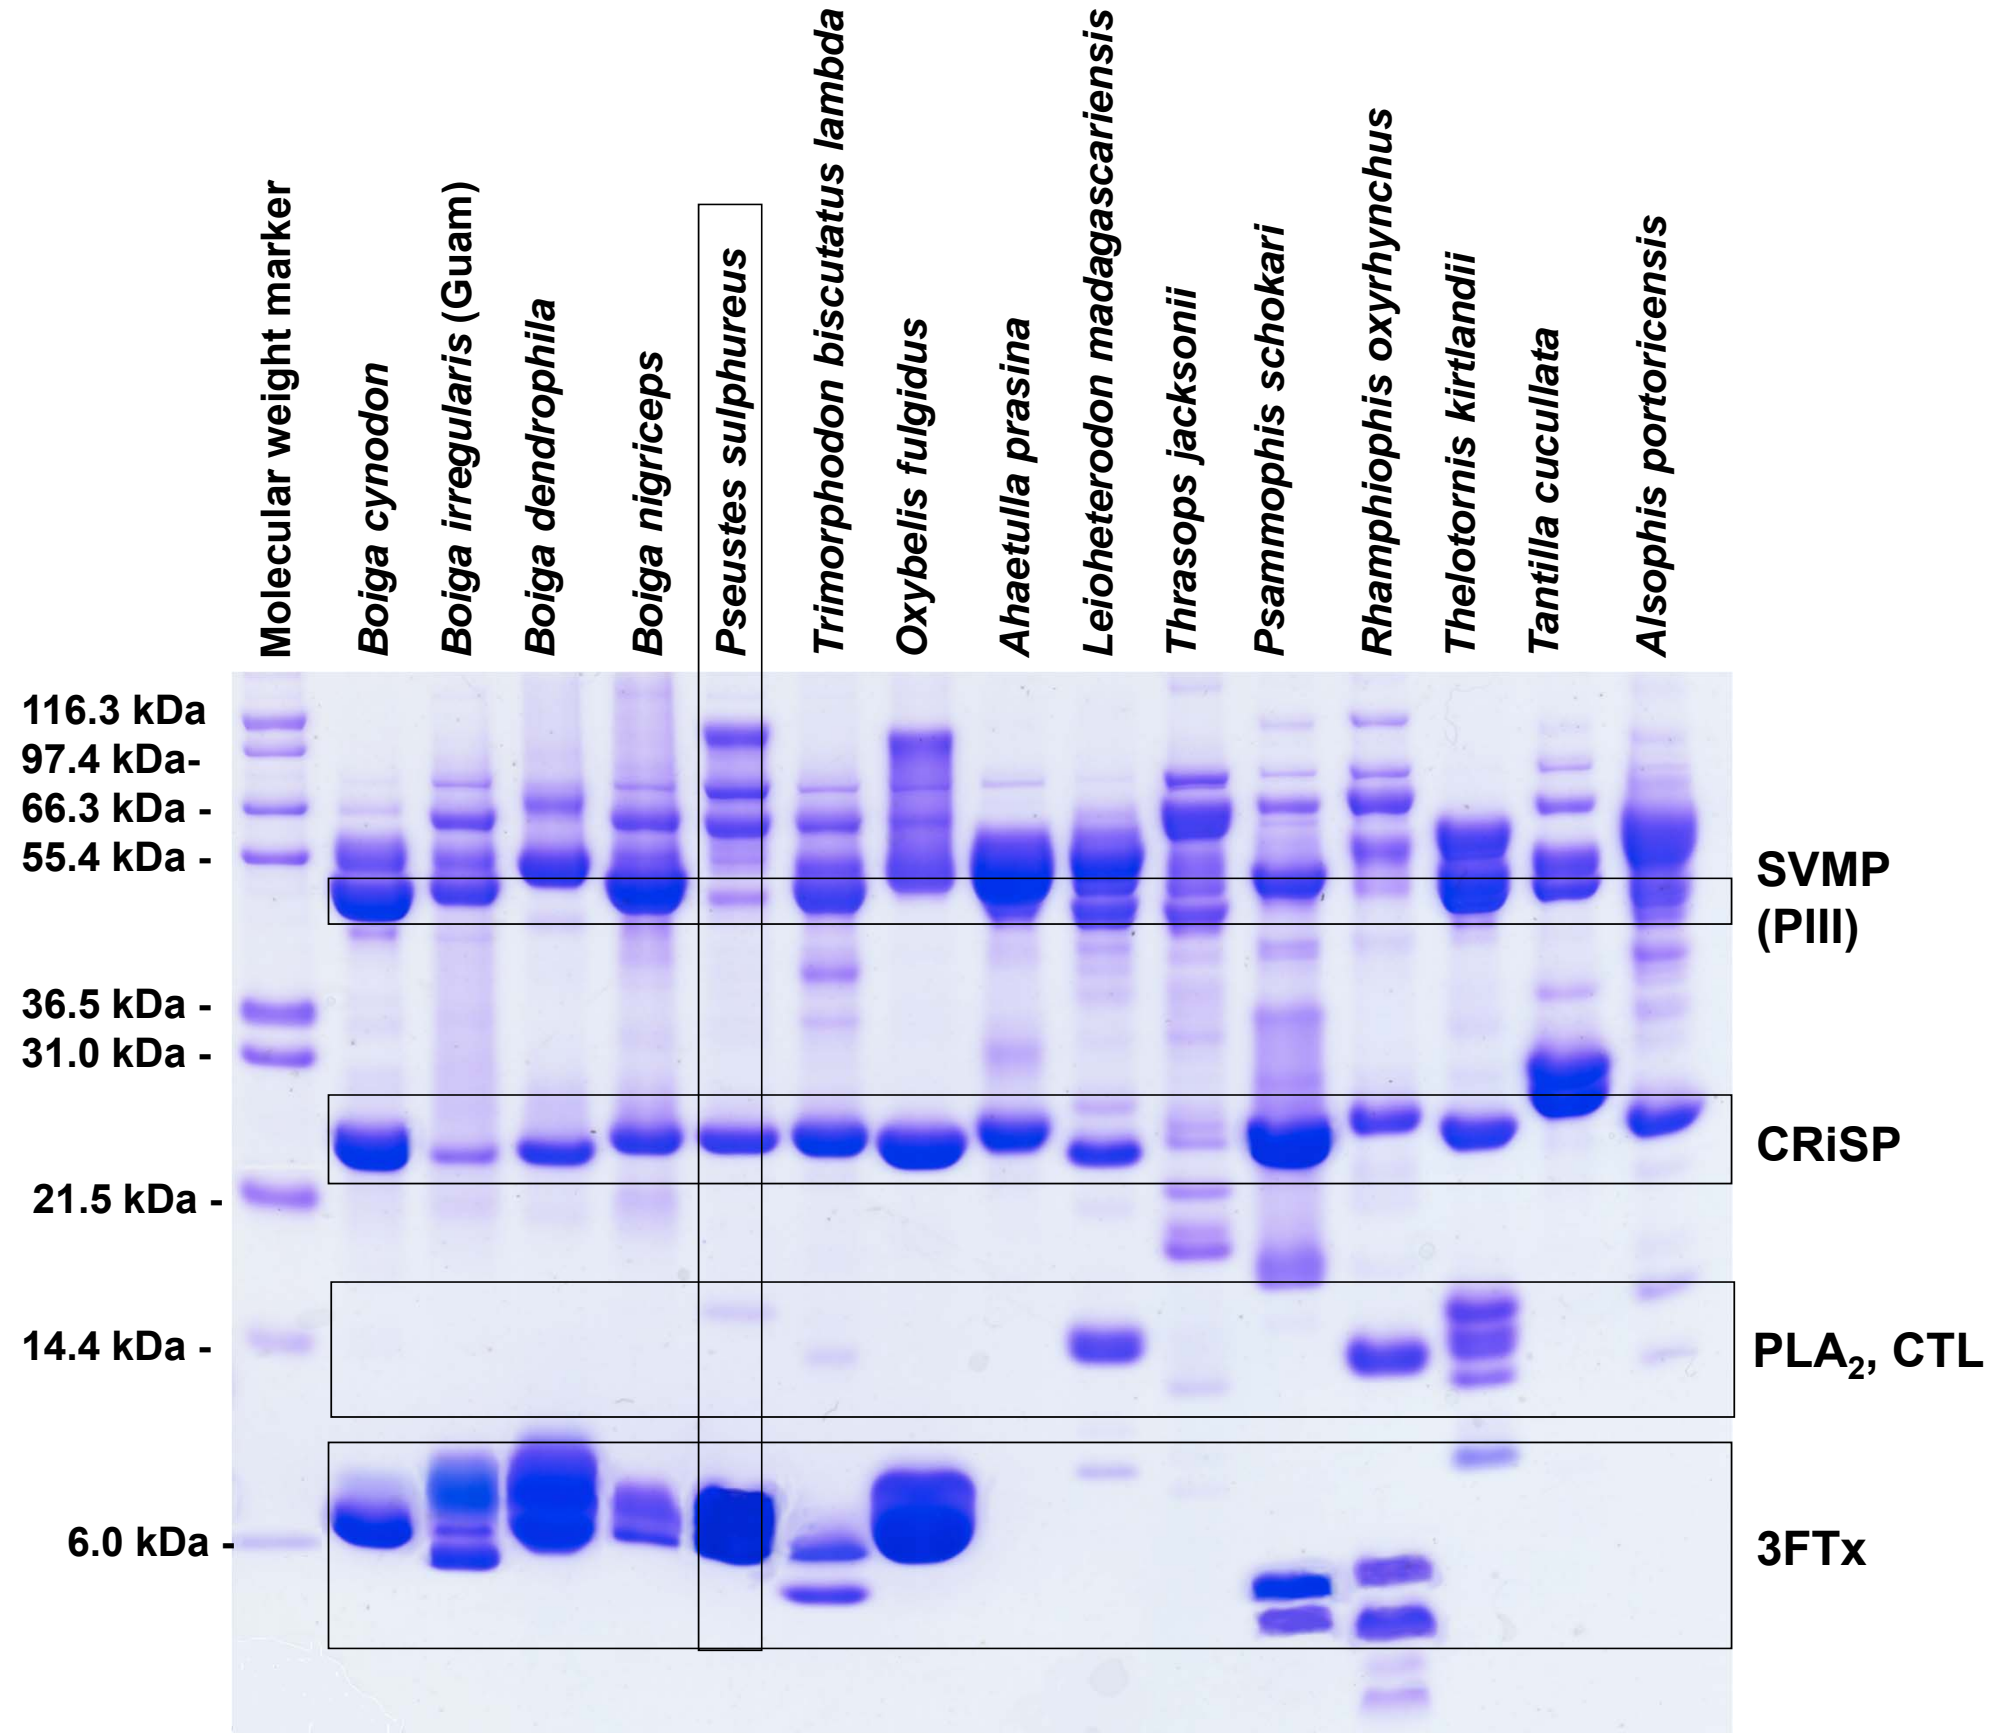

Supplemental Figure 1A

**B**

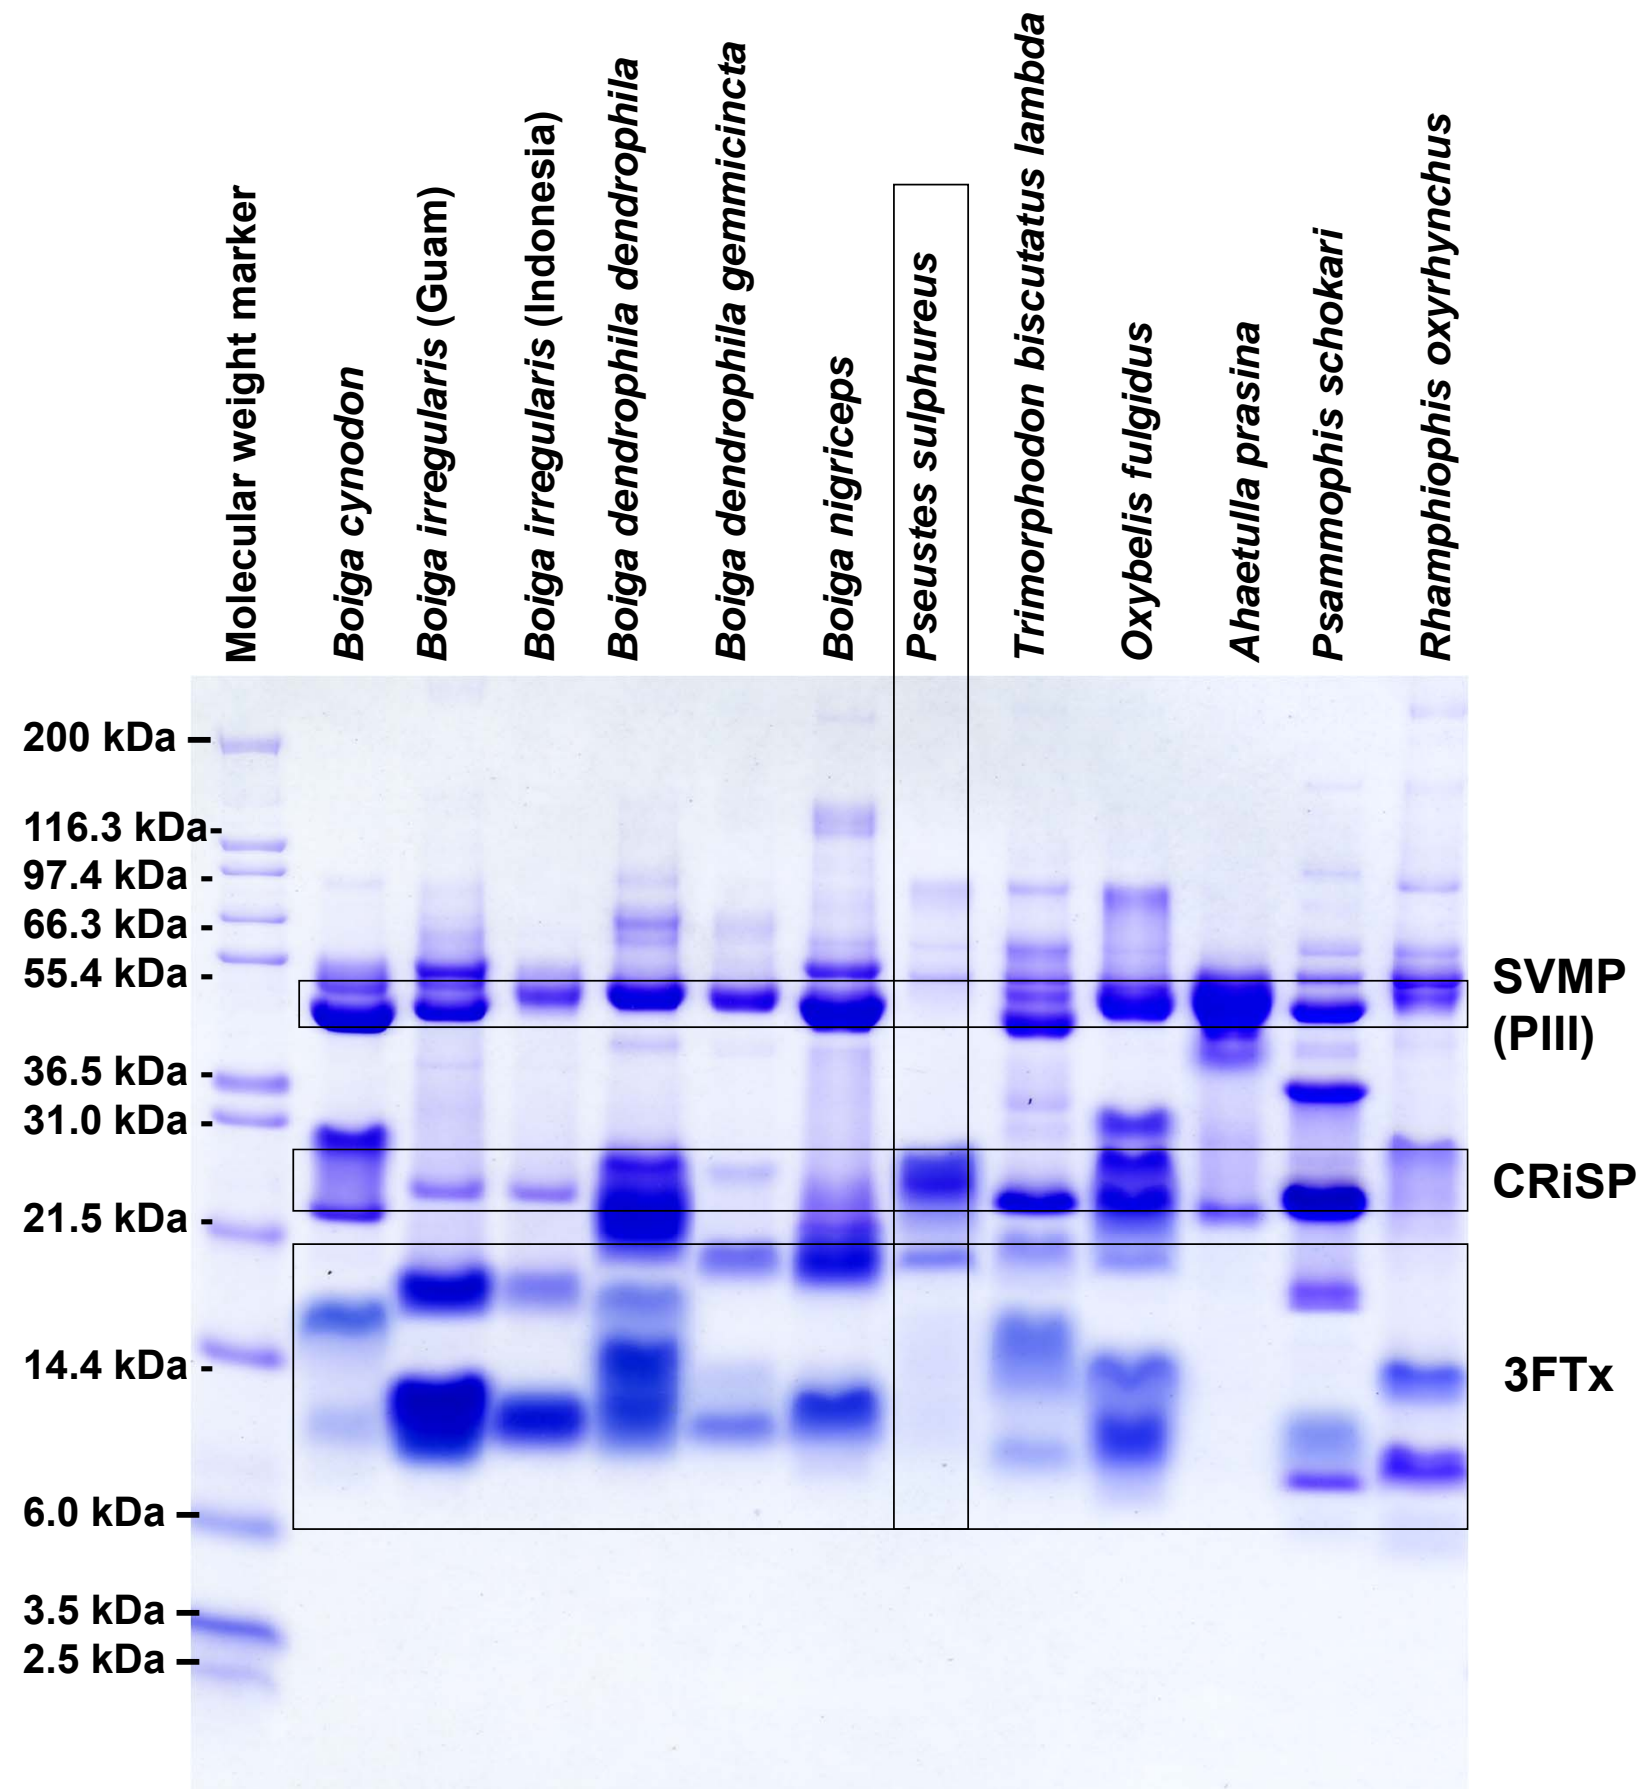

Supplemental Figure 1B

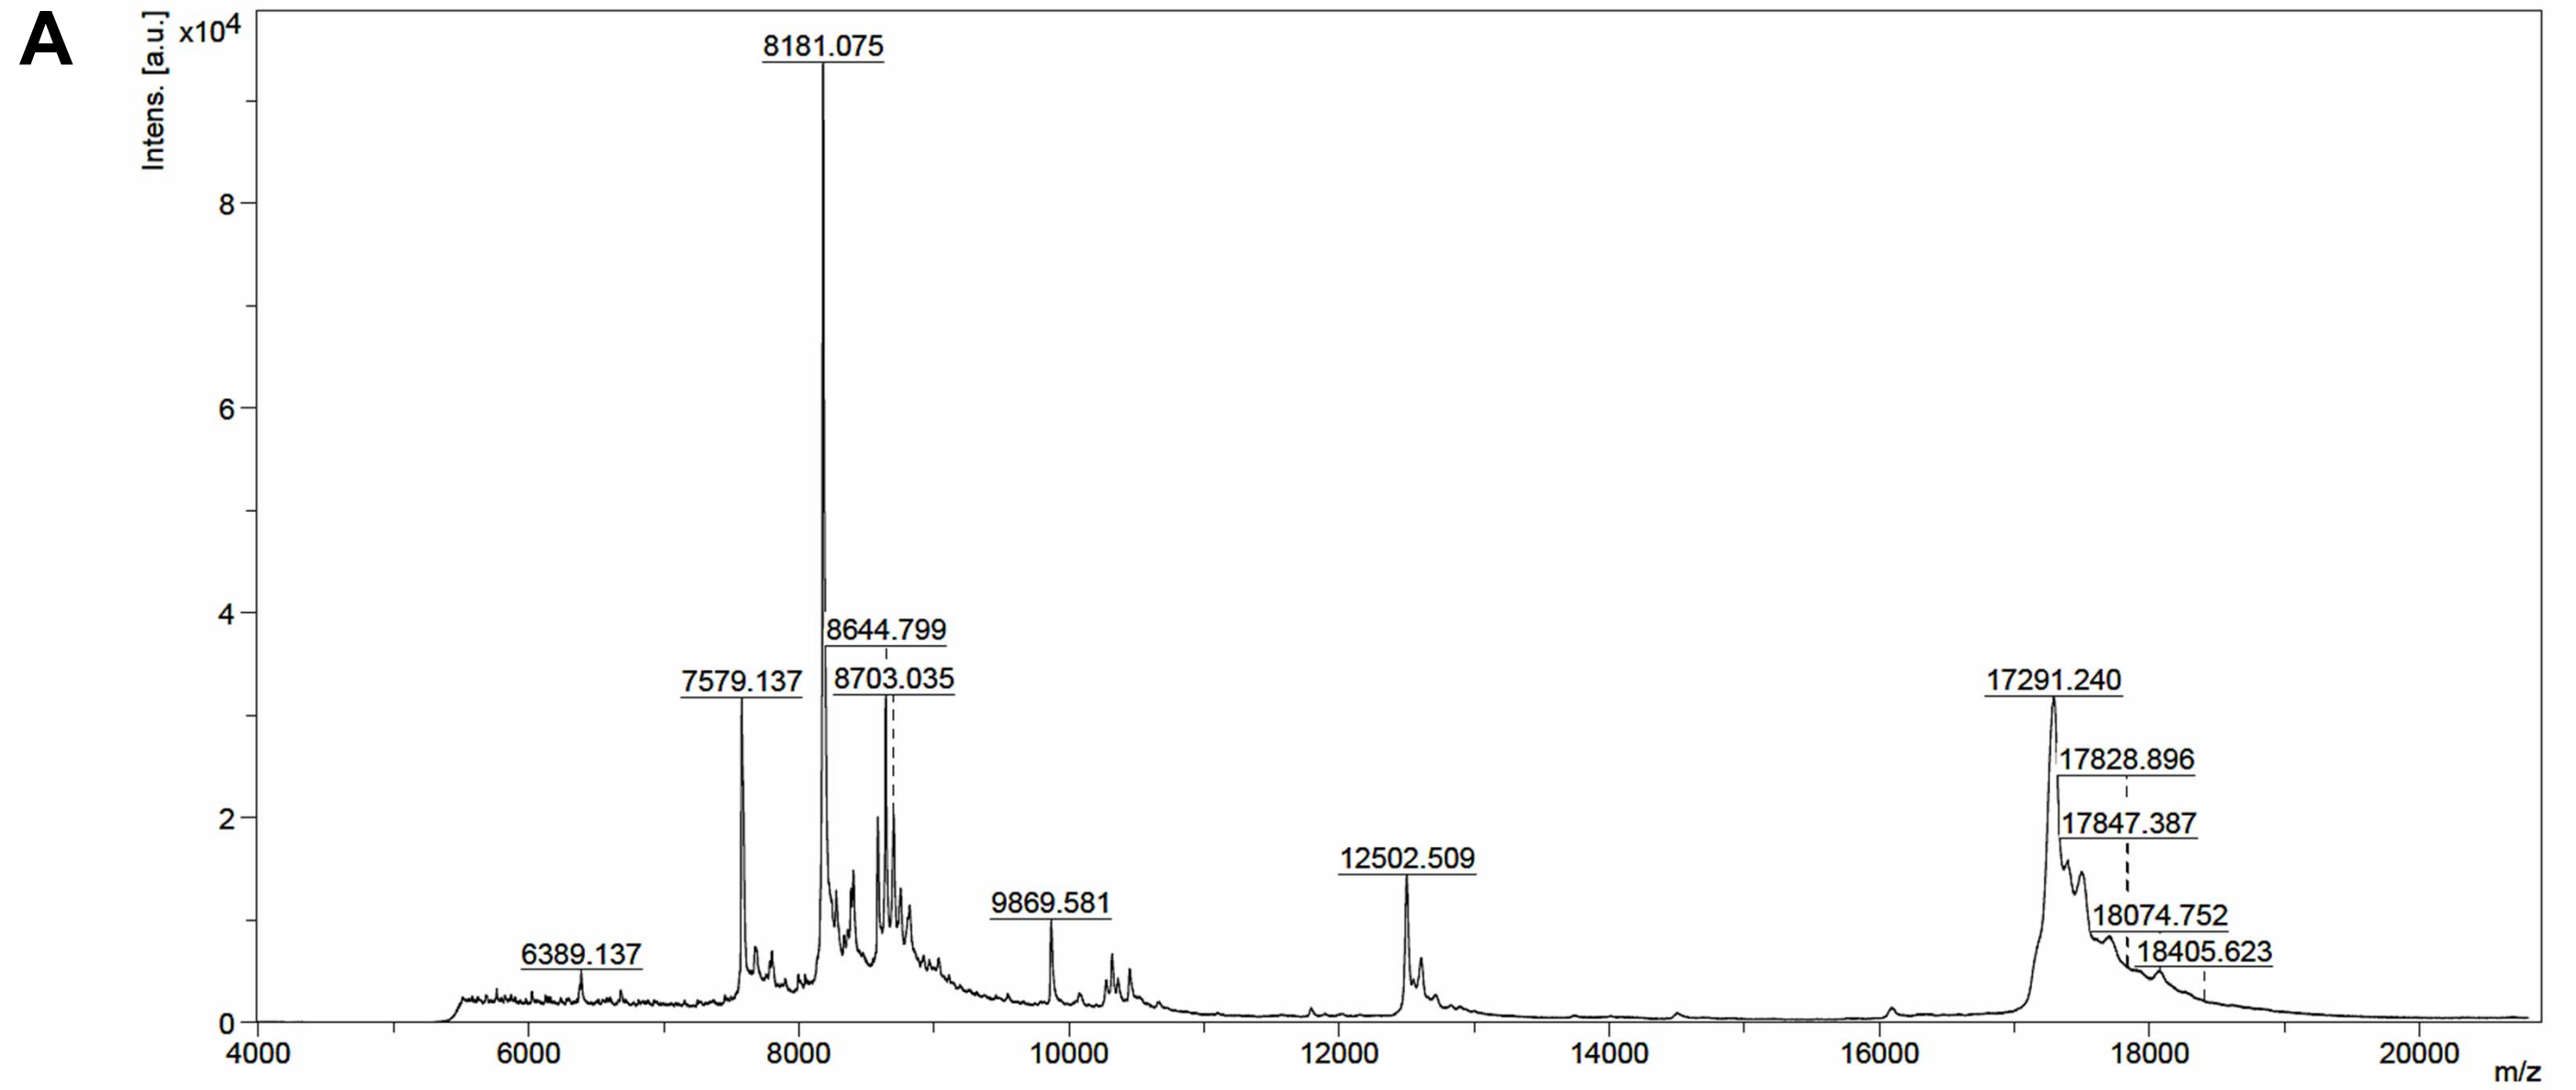

Supplemental Figure 2A

**B**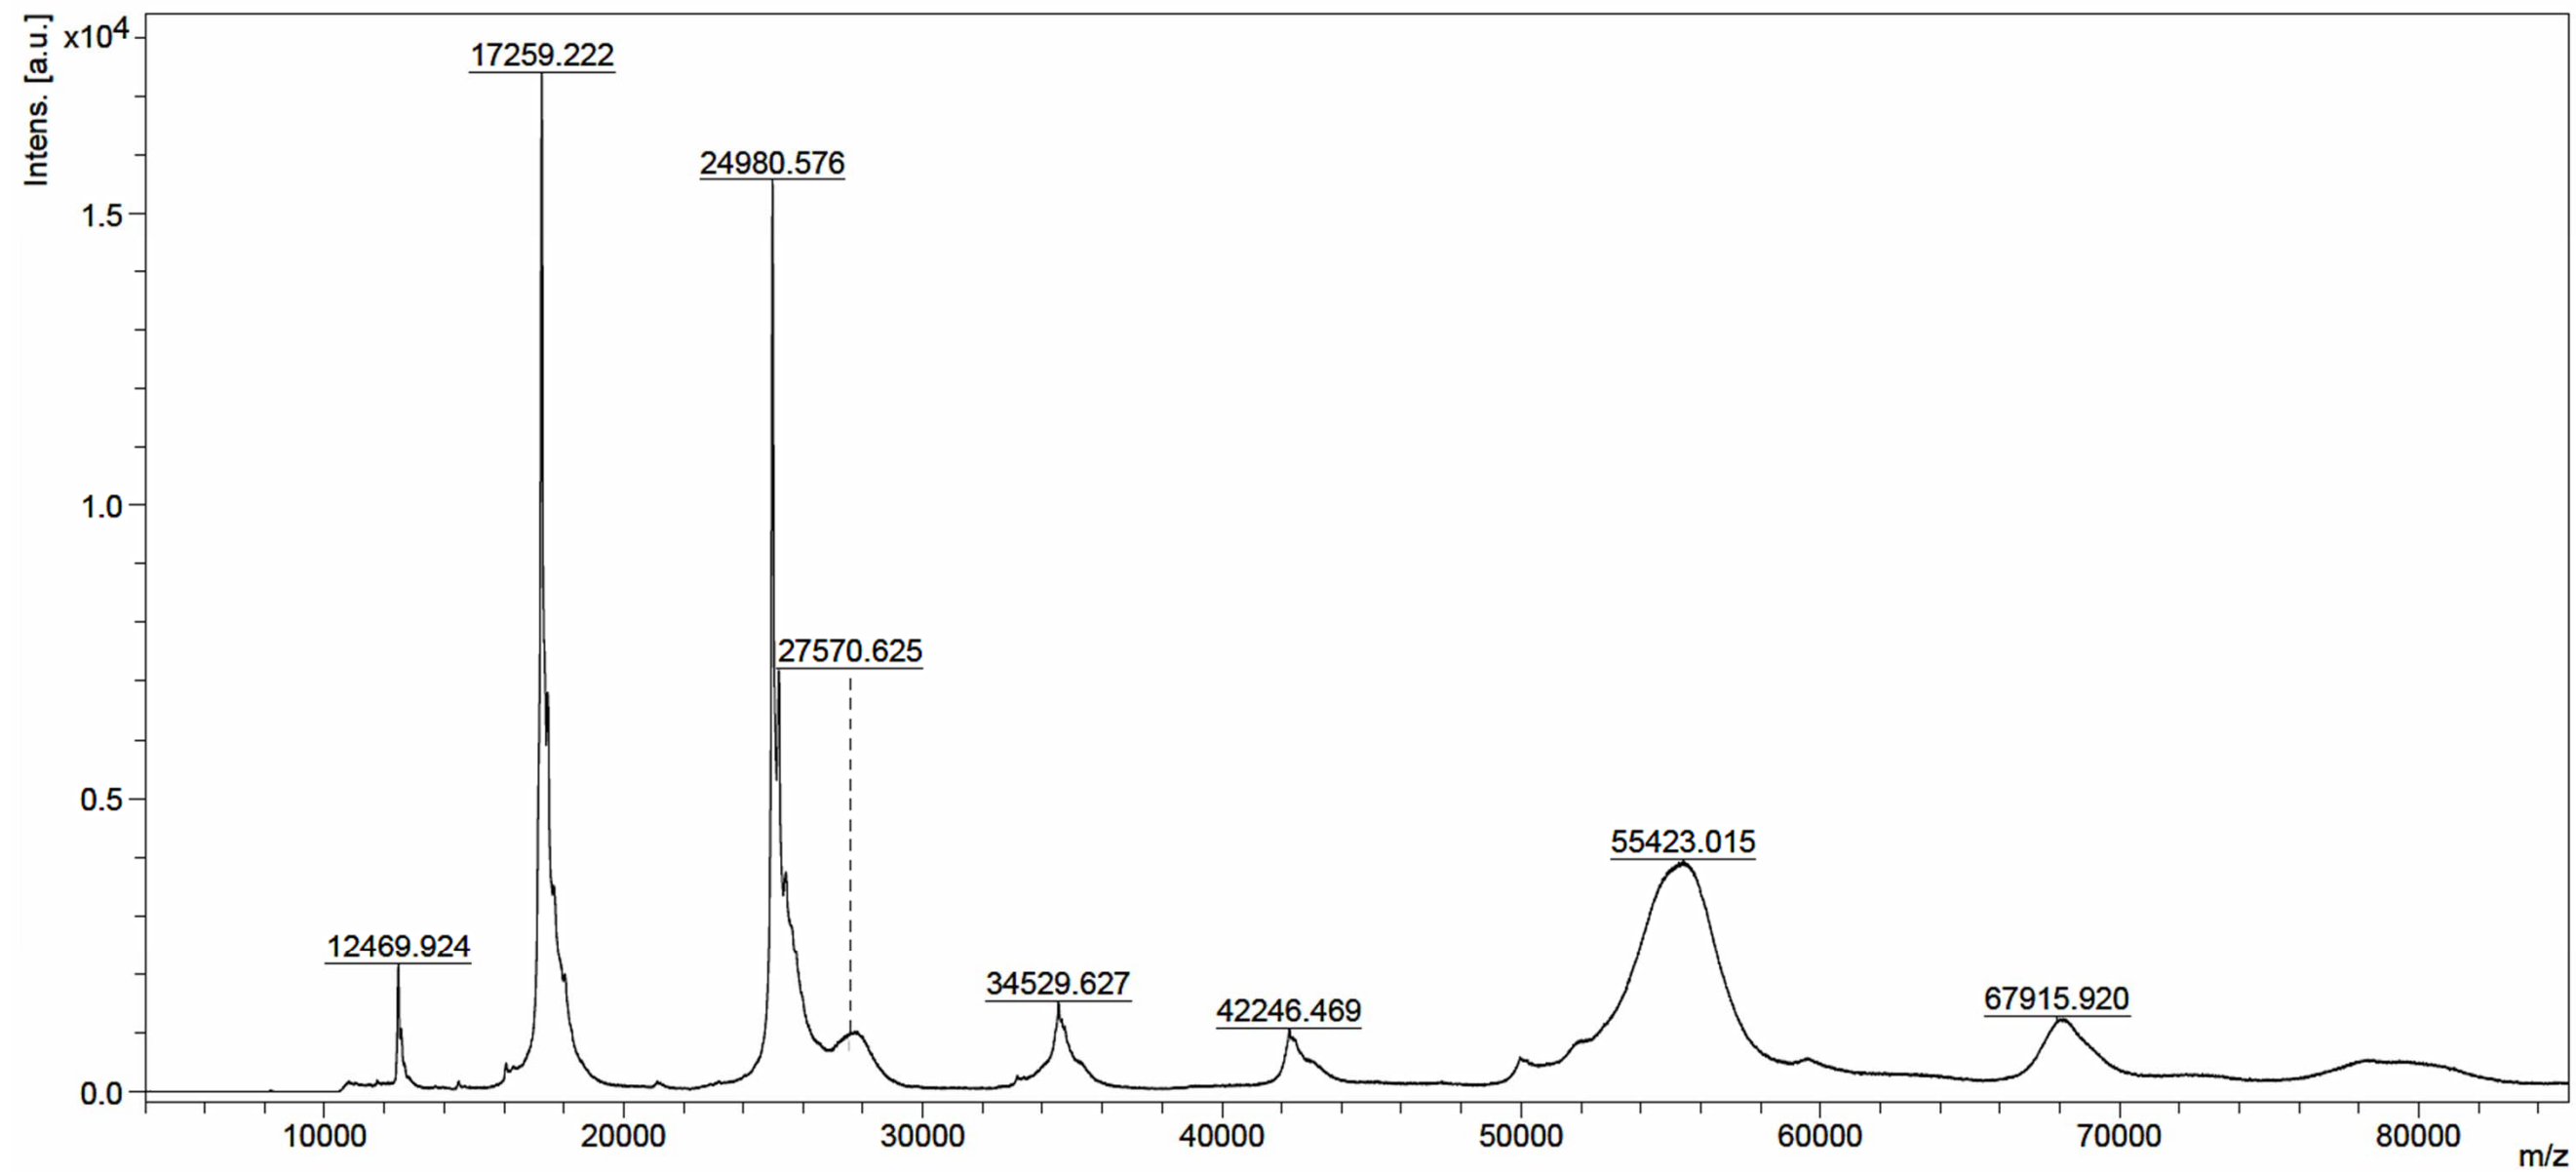

Supplemental Figure 2B

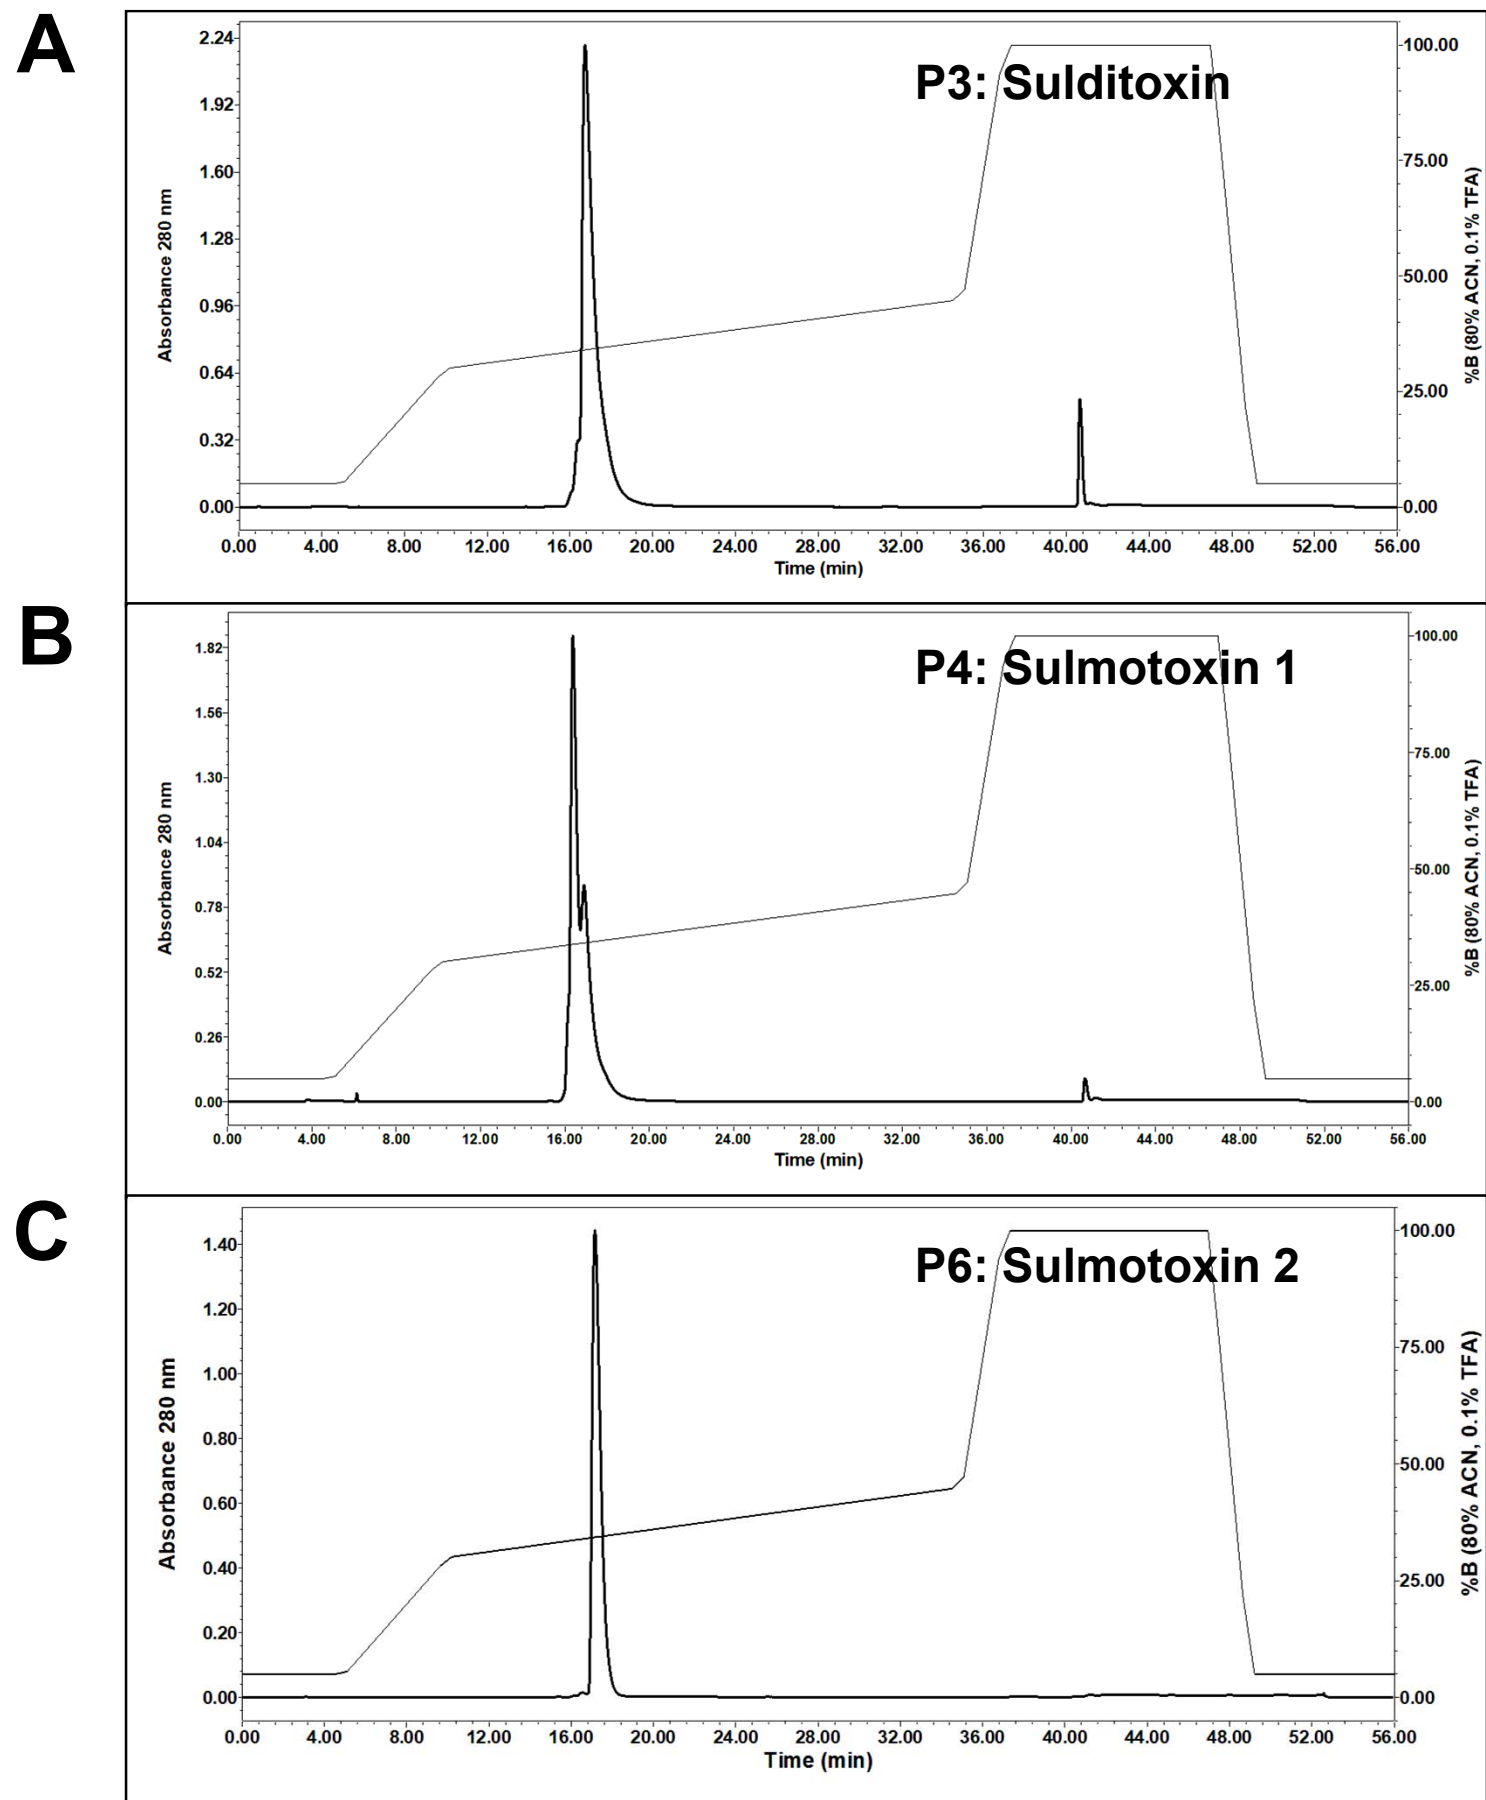

Supplemental Figure 3

**A**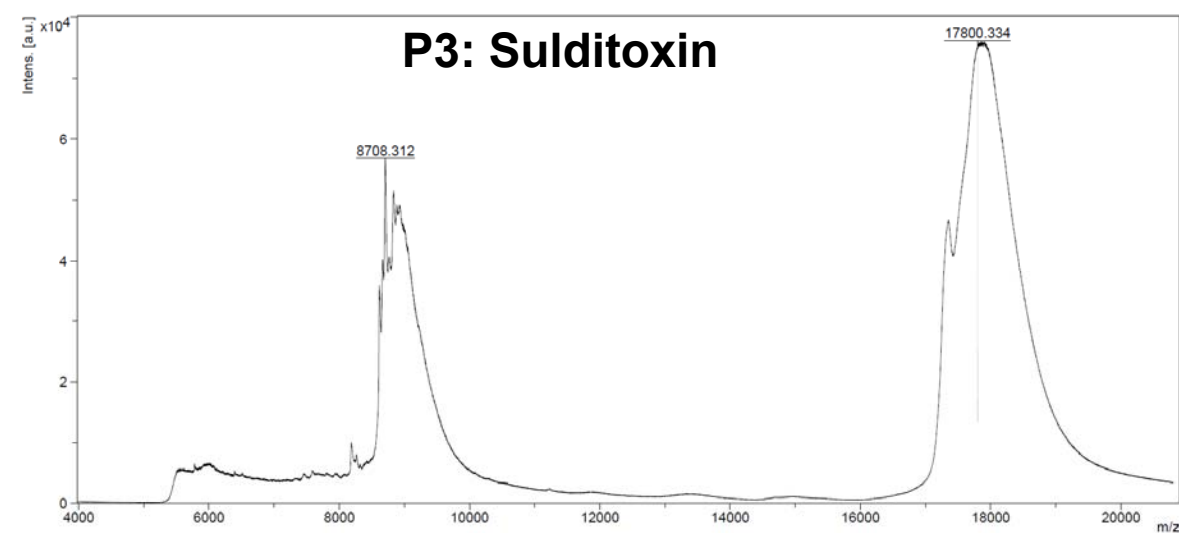**B**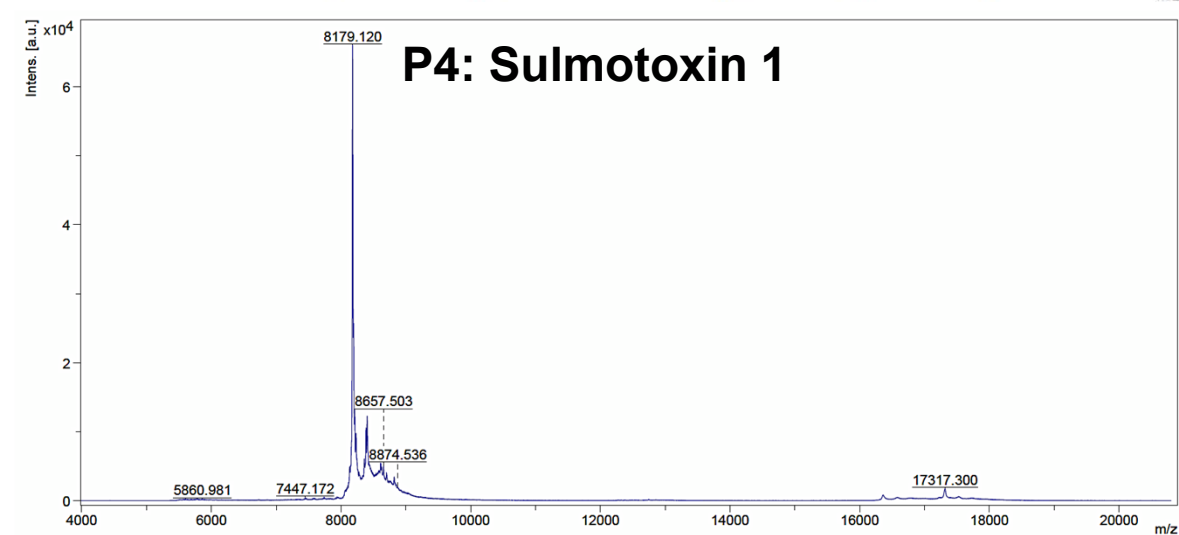**C**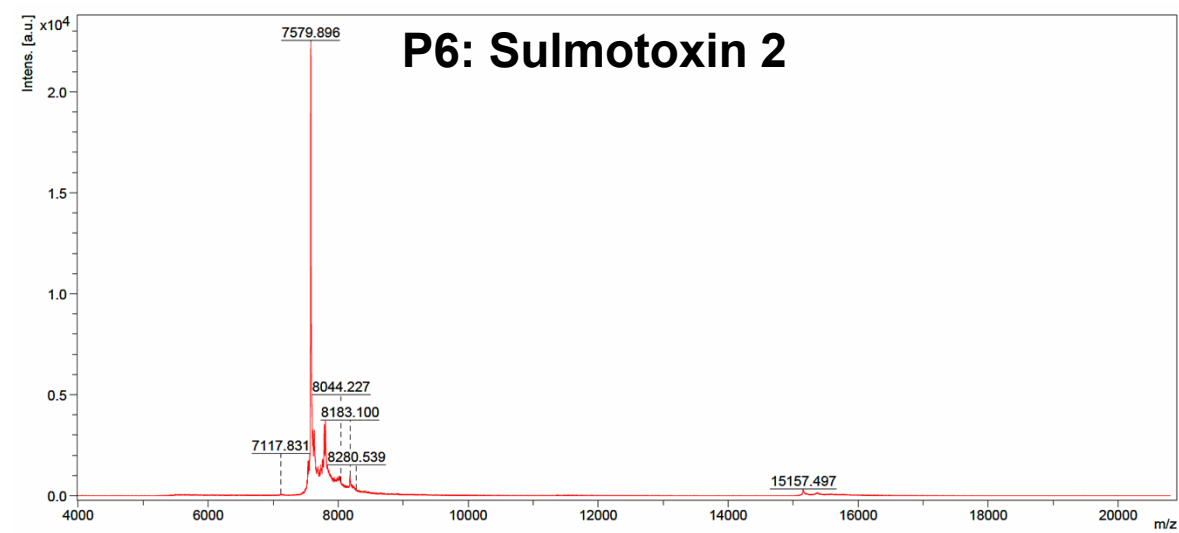

**A**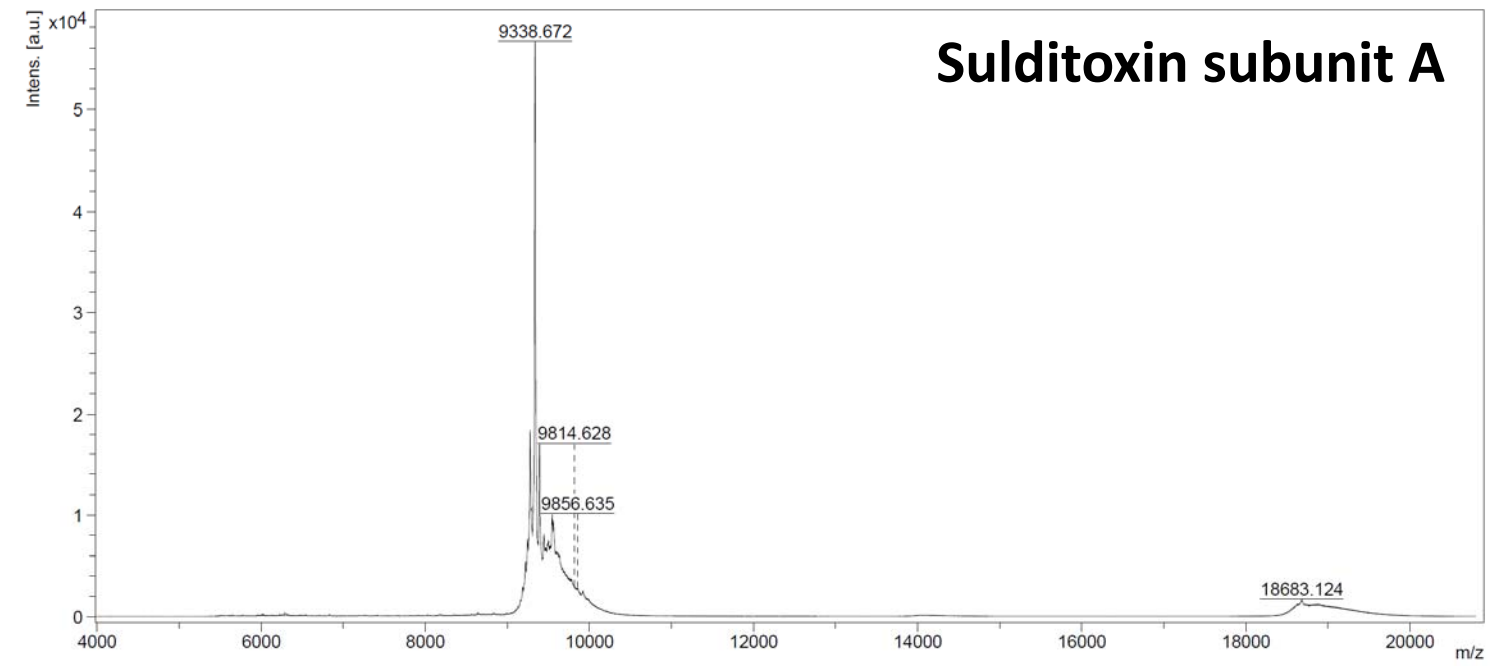**B**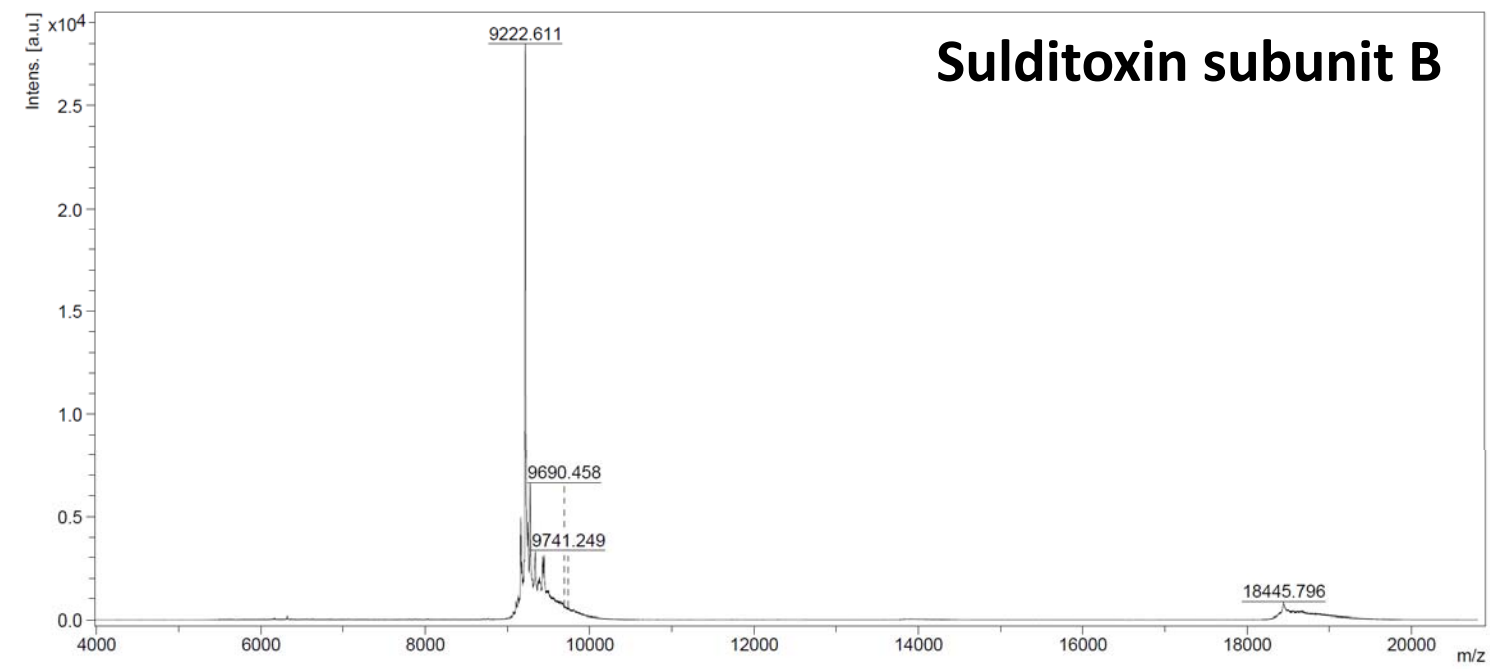

**A**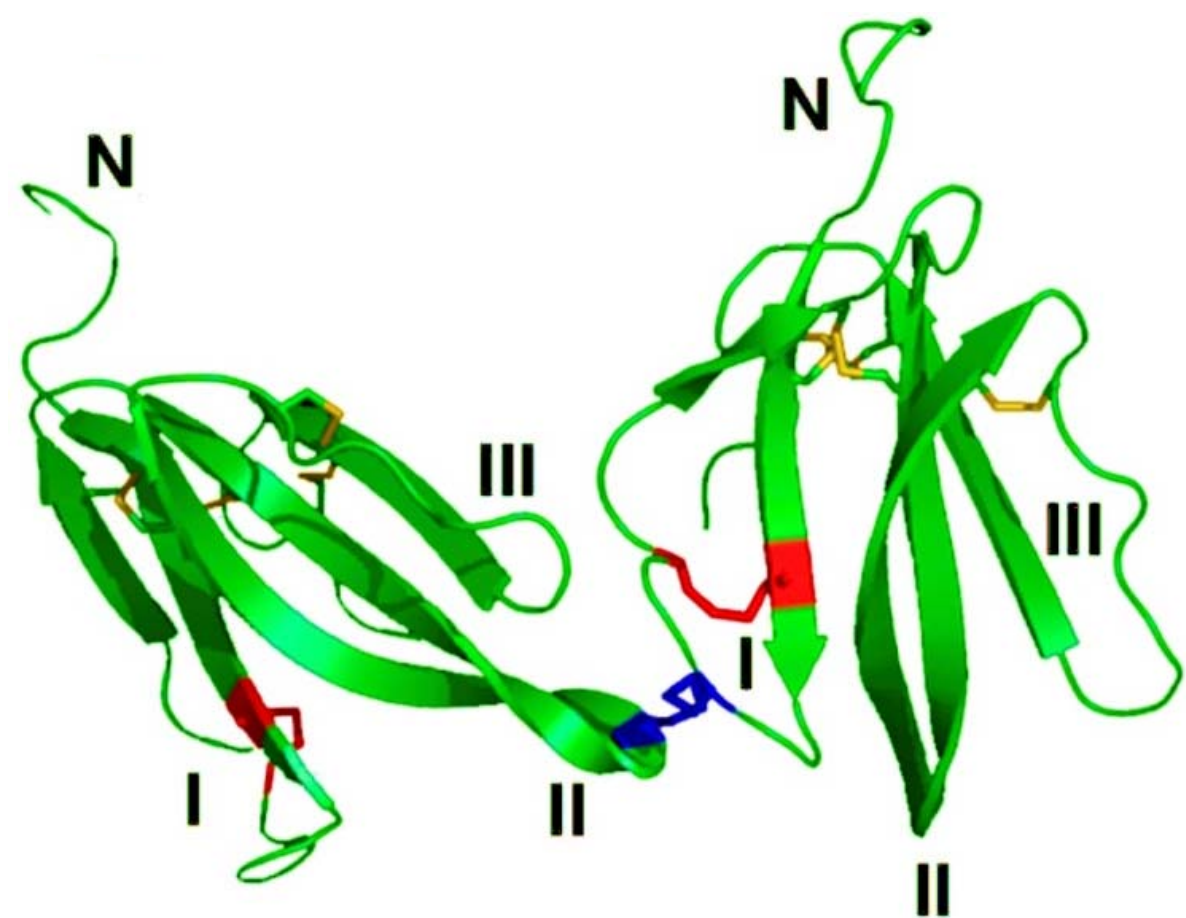**B**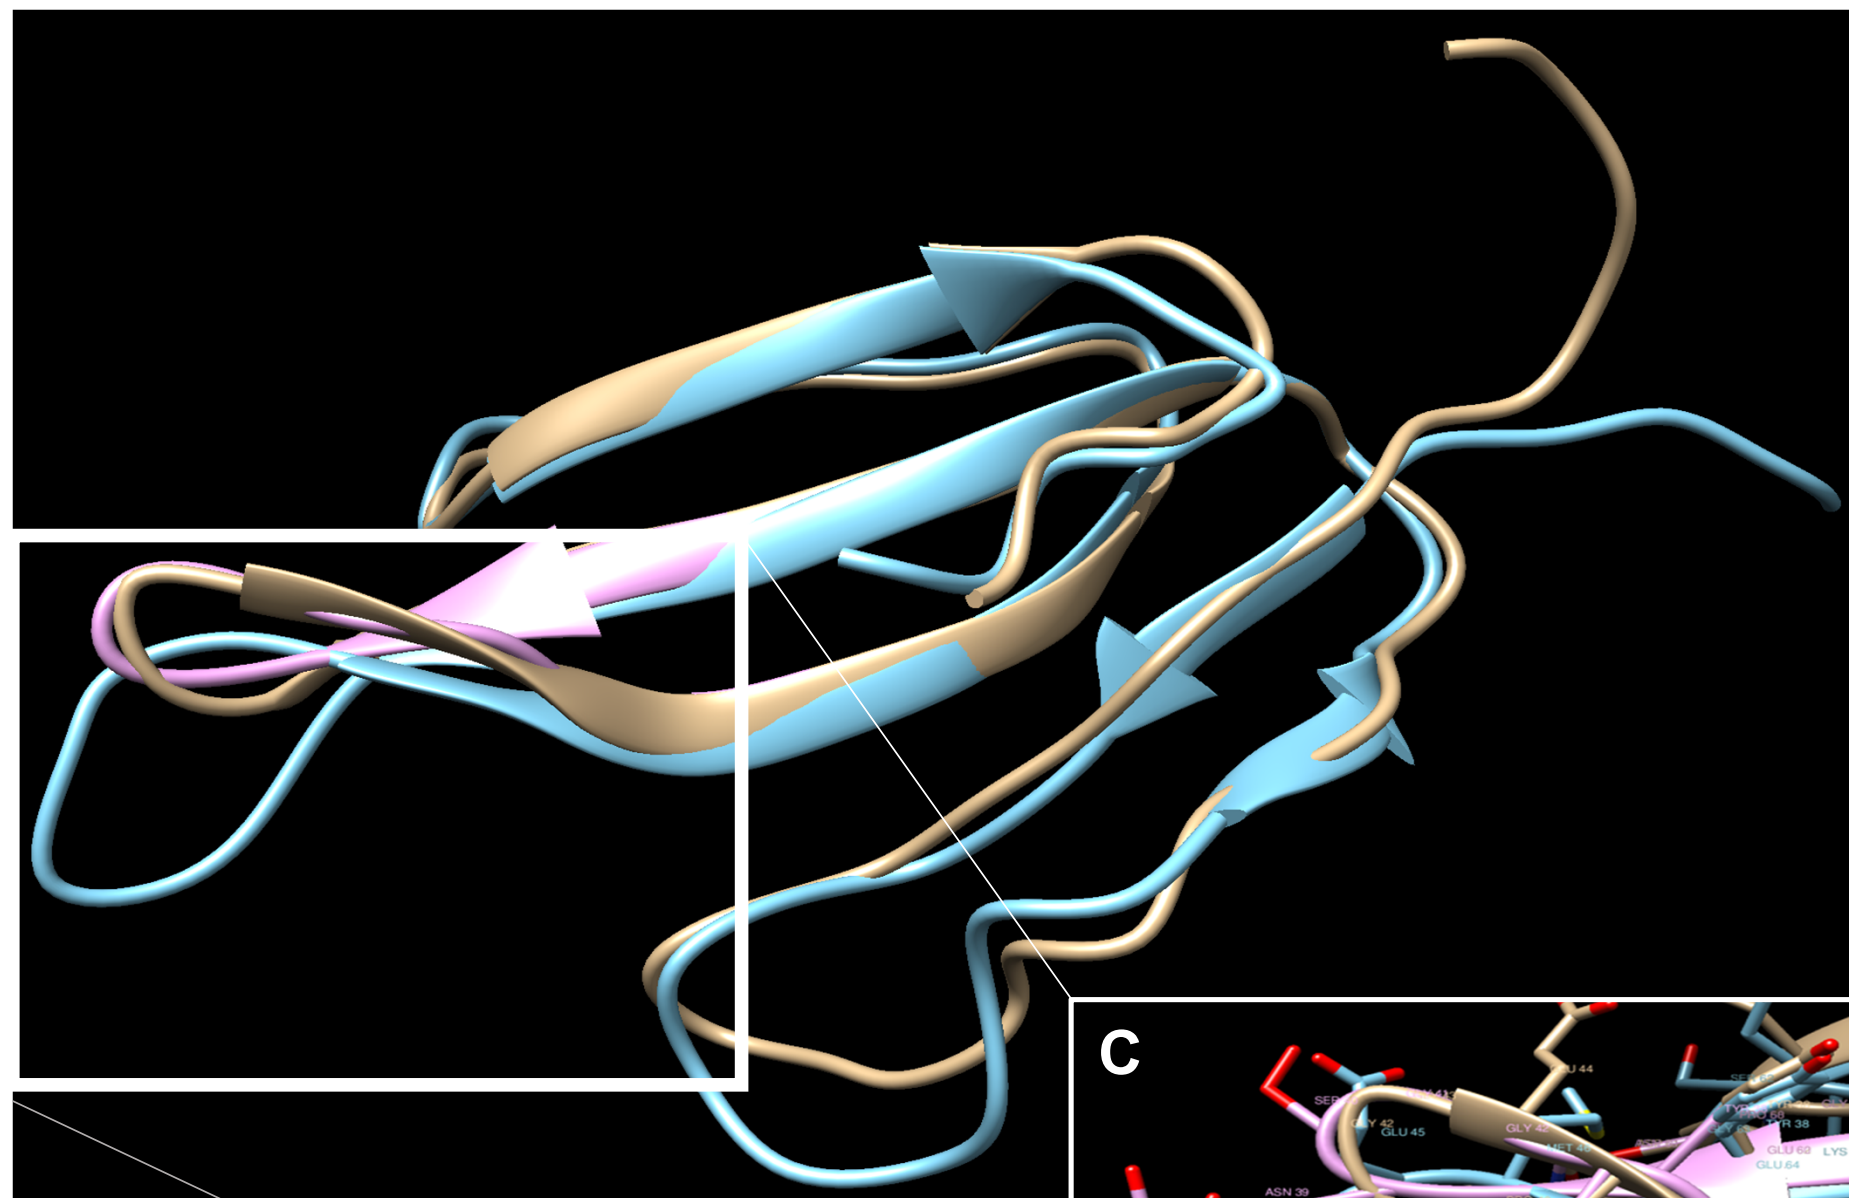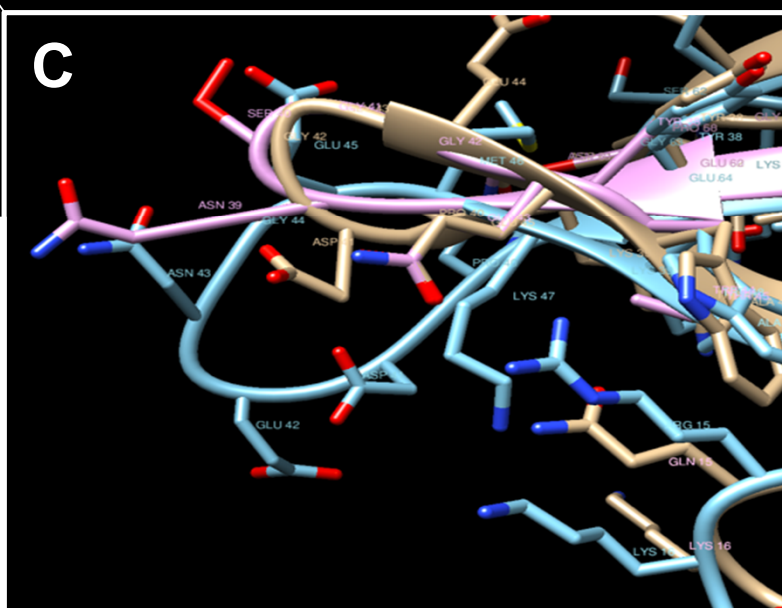



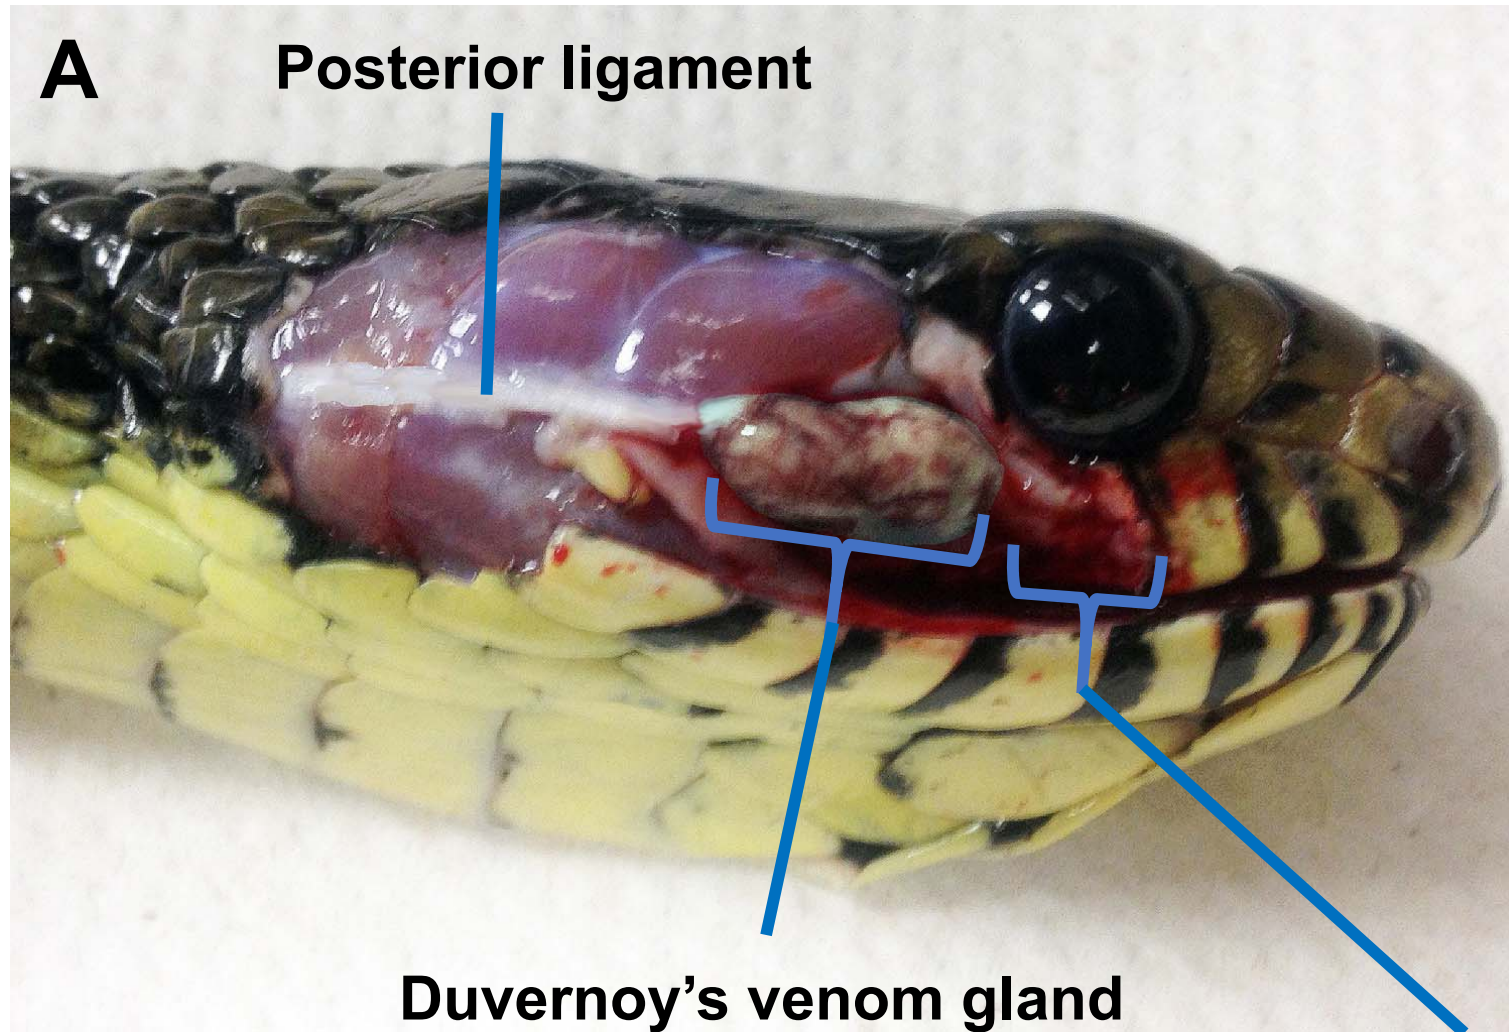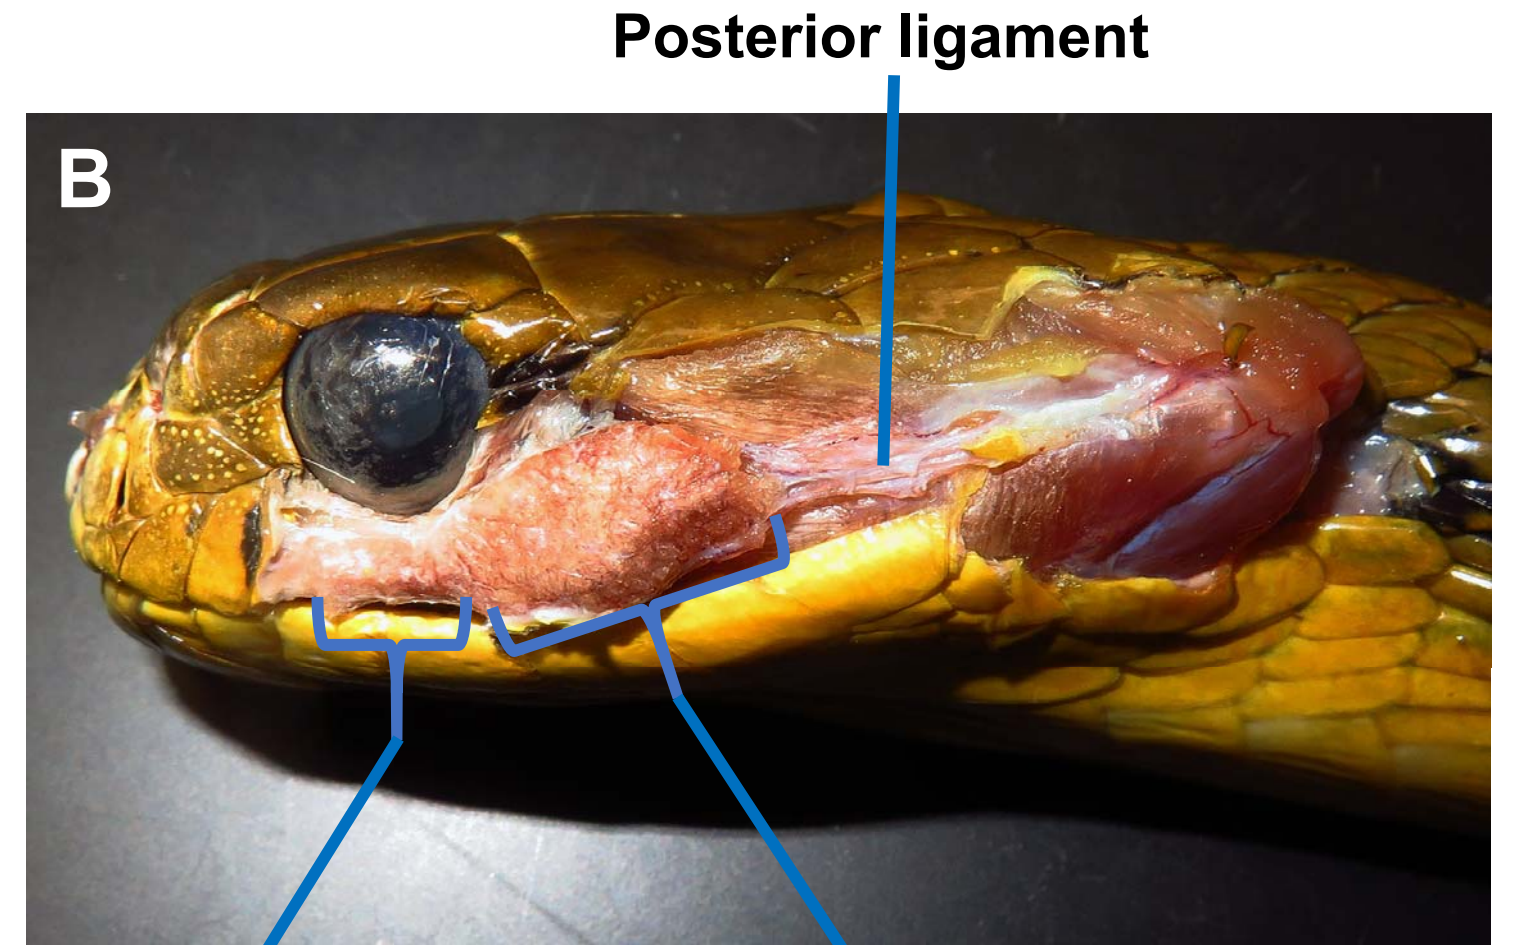

Duvernoy's venom gland

Supralabial (salivary) gland

Duvernoy's venom gland

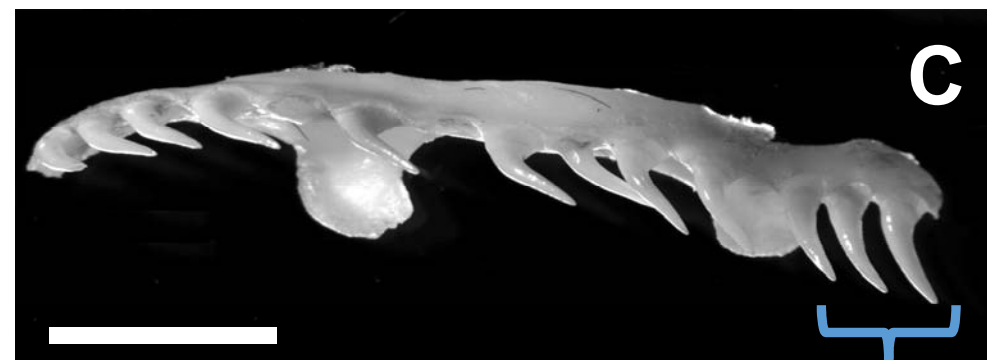

Enlarged rear teeth

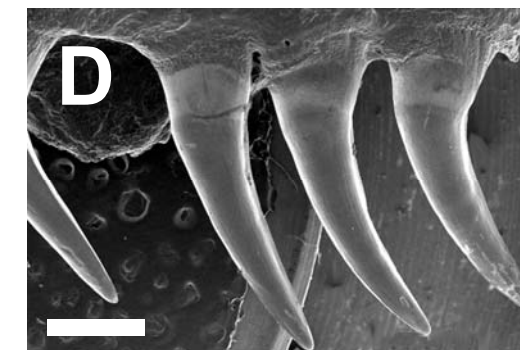

Supplemental Figure 7A-D

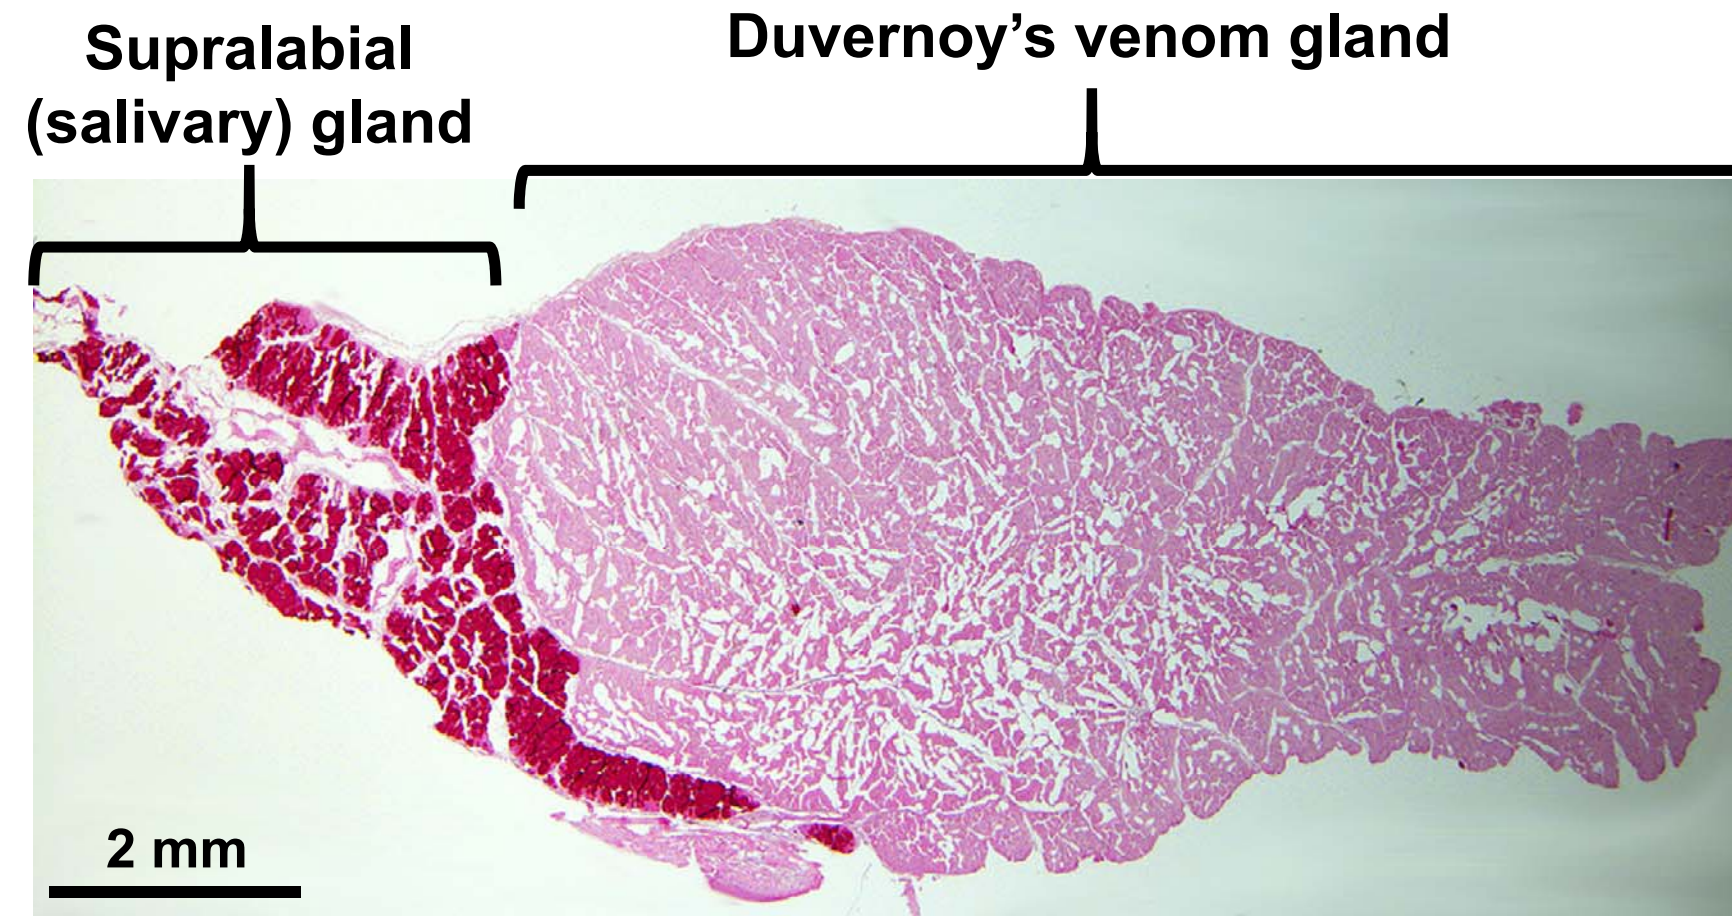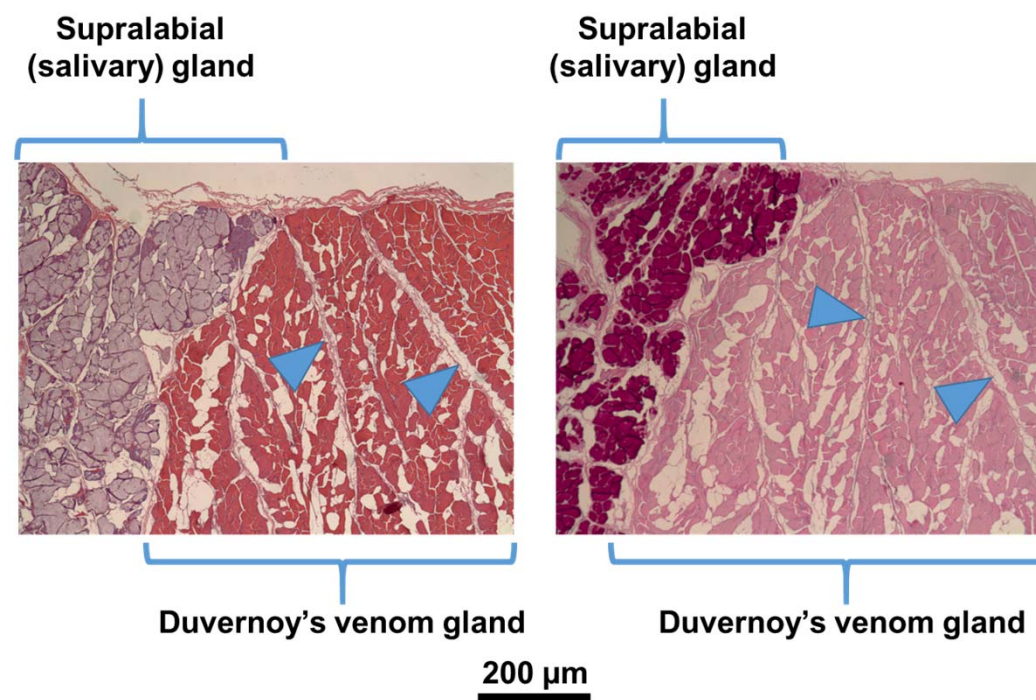

Supplemental Figure 7E

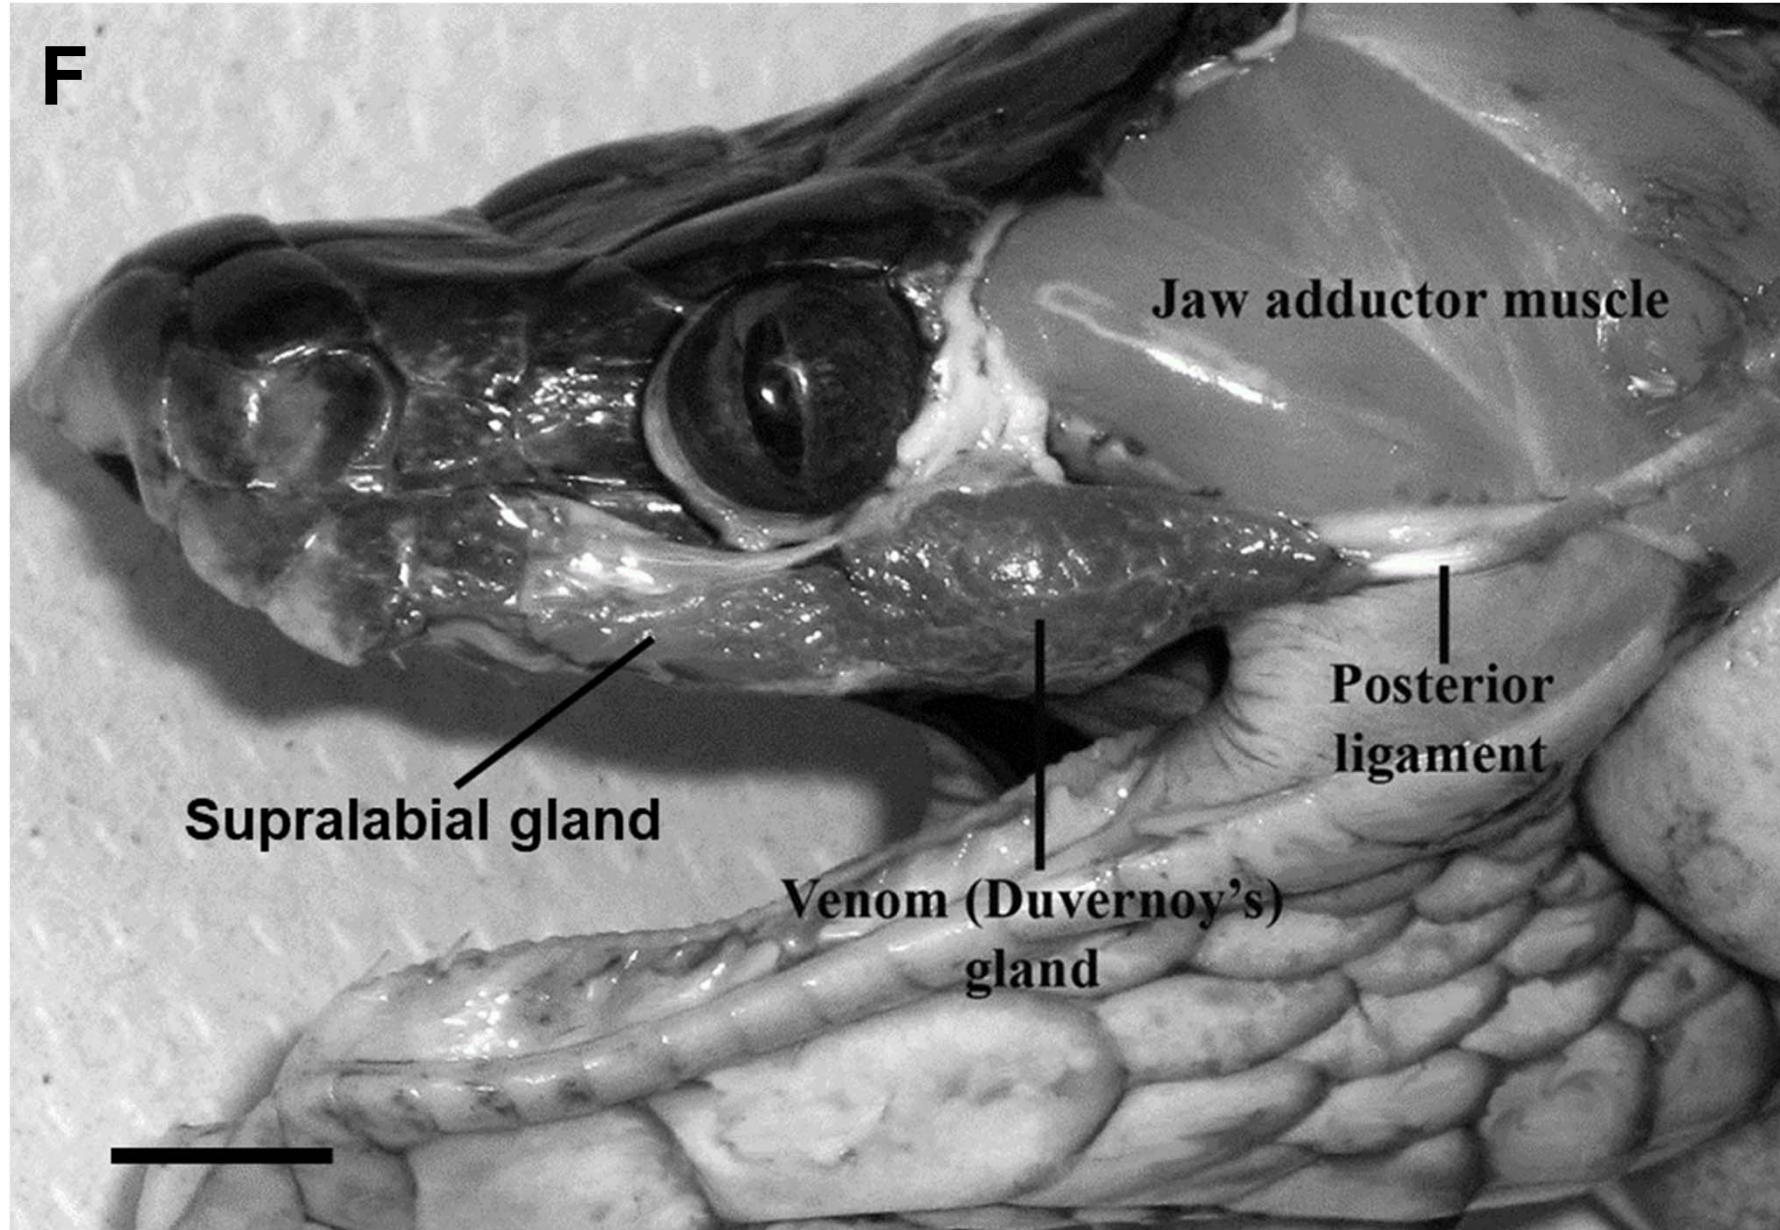

Supplemental Figure 7F

**A****Transcriptome**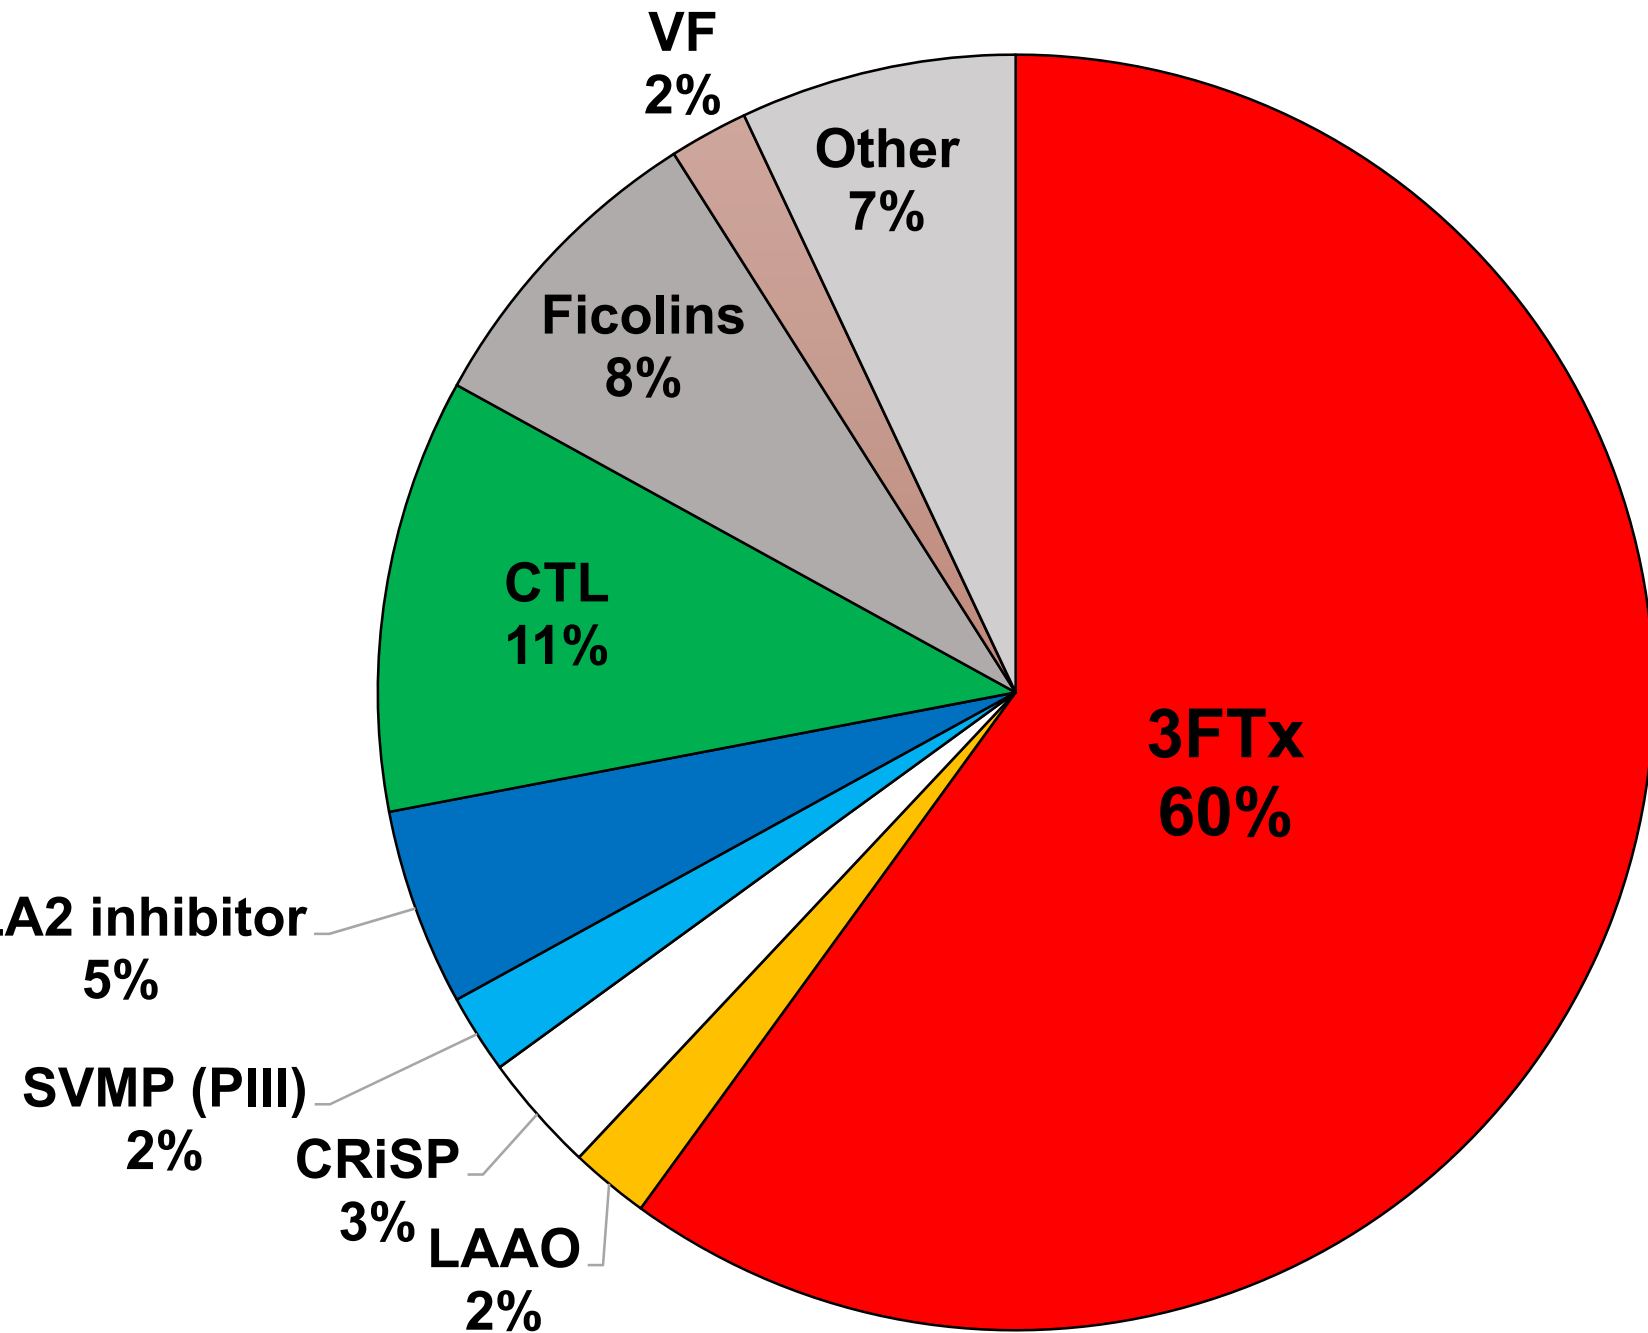**B****Proteome – public database**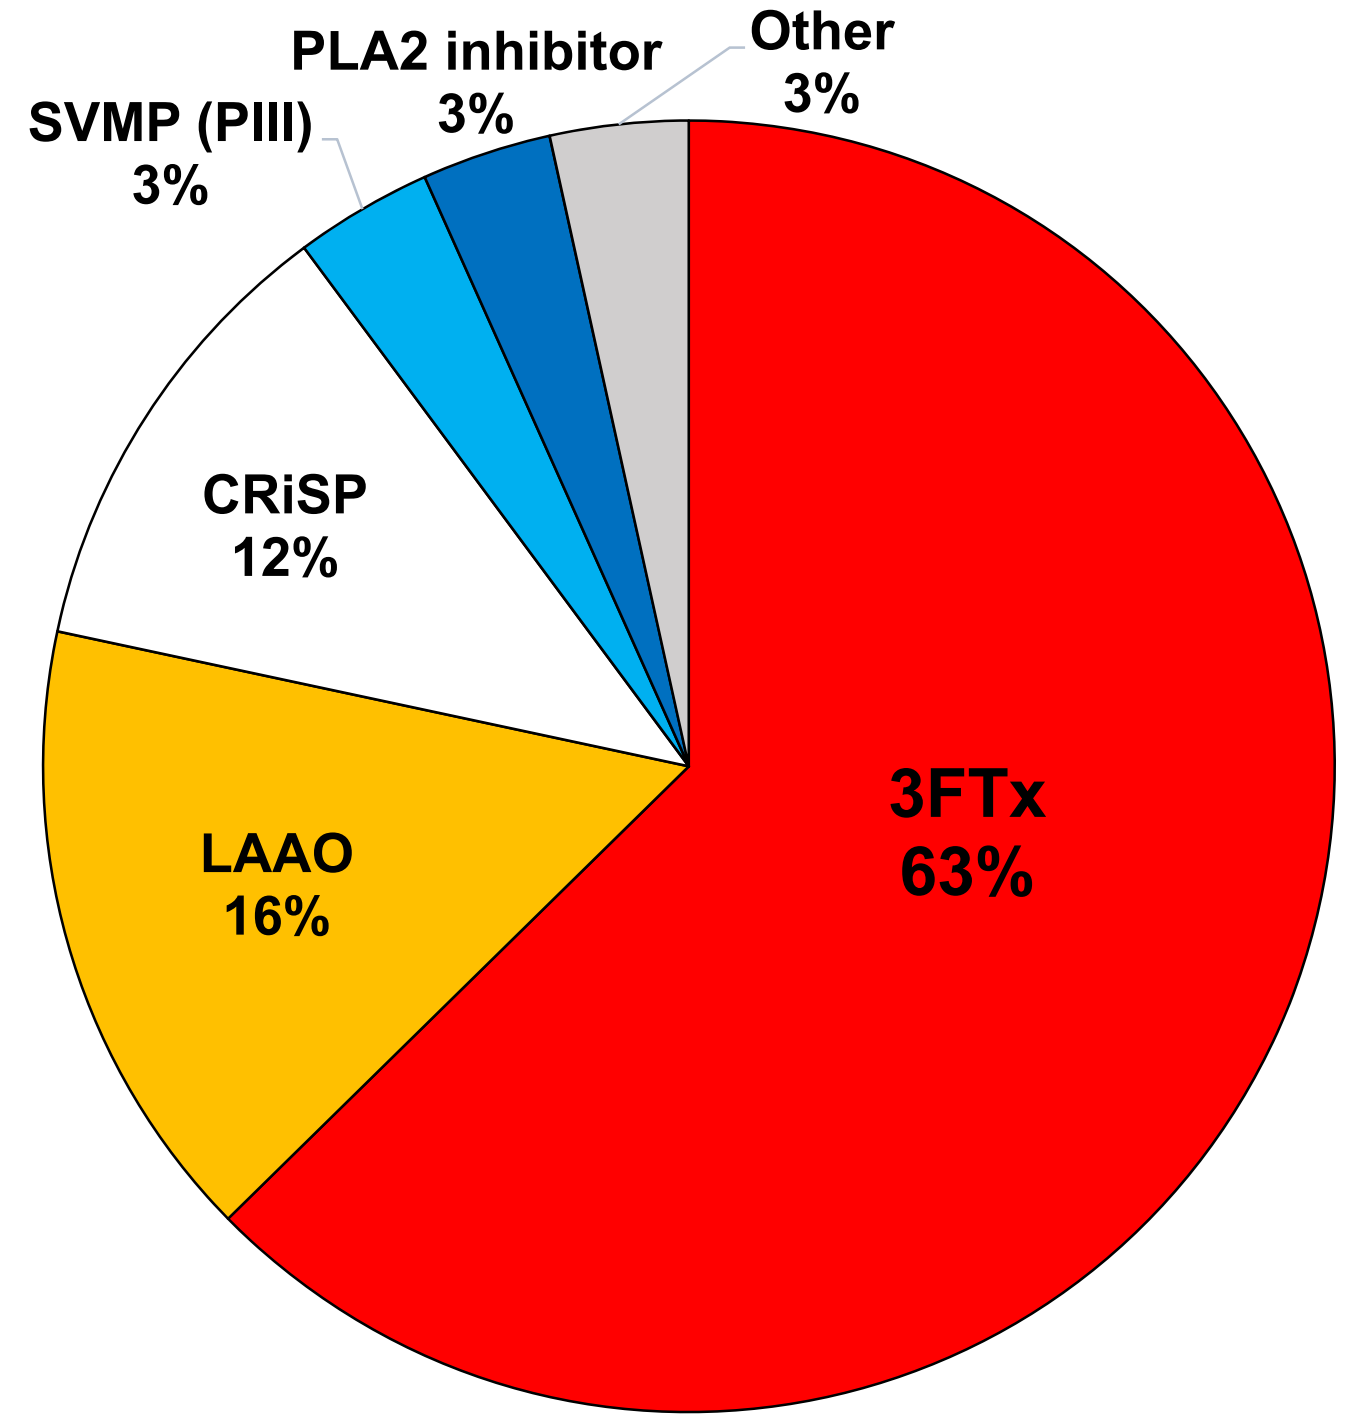

**C**

**Proteome – reference database**

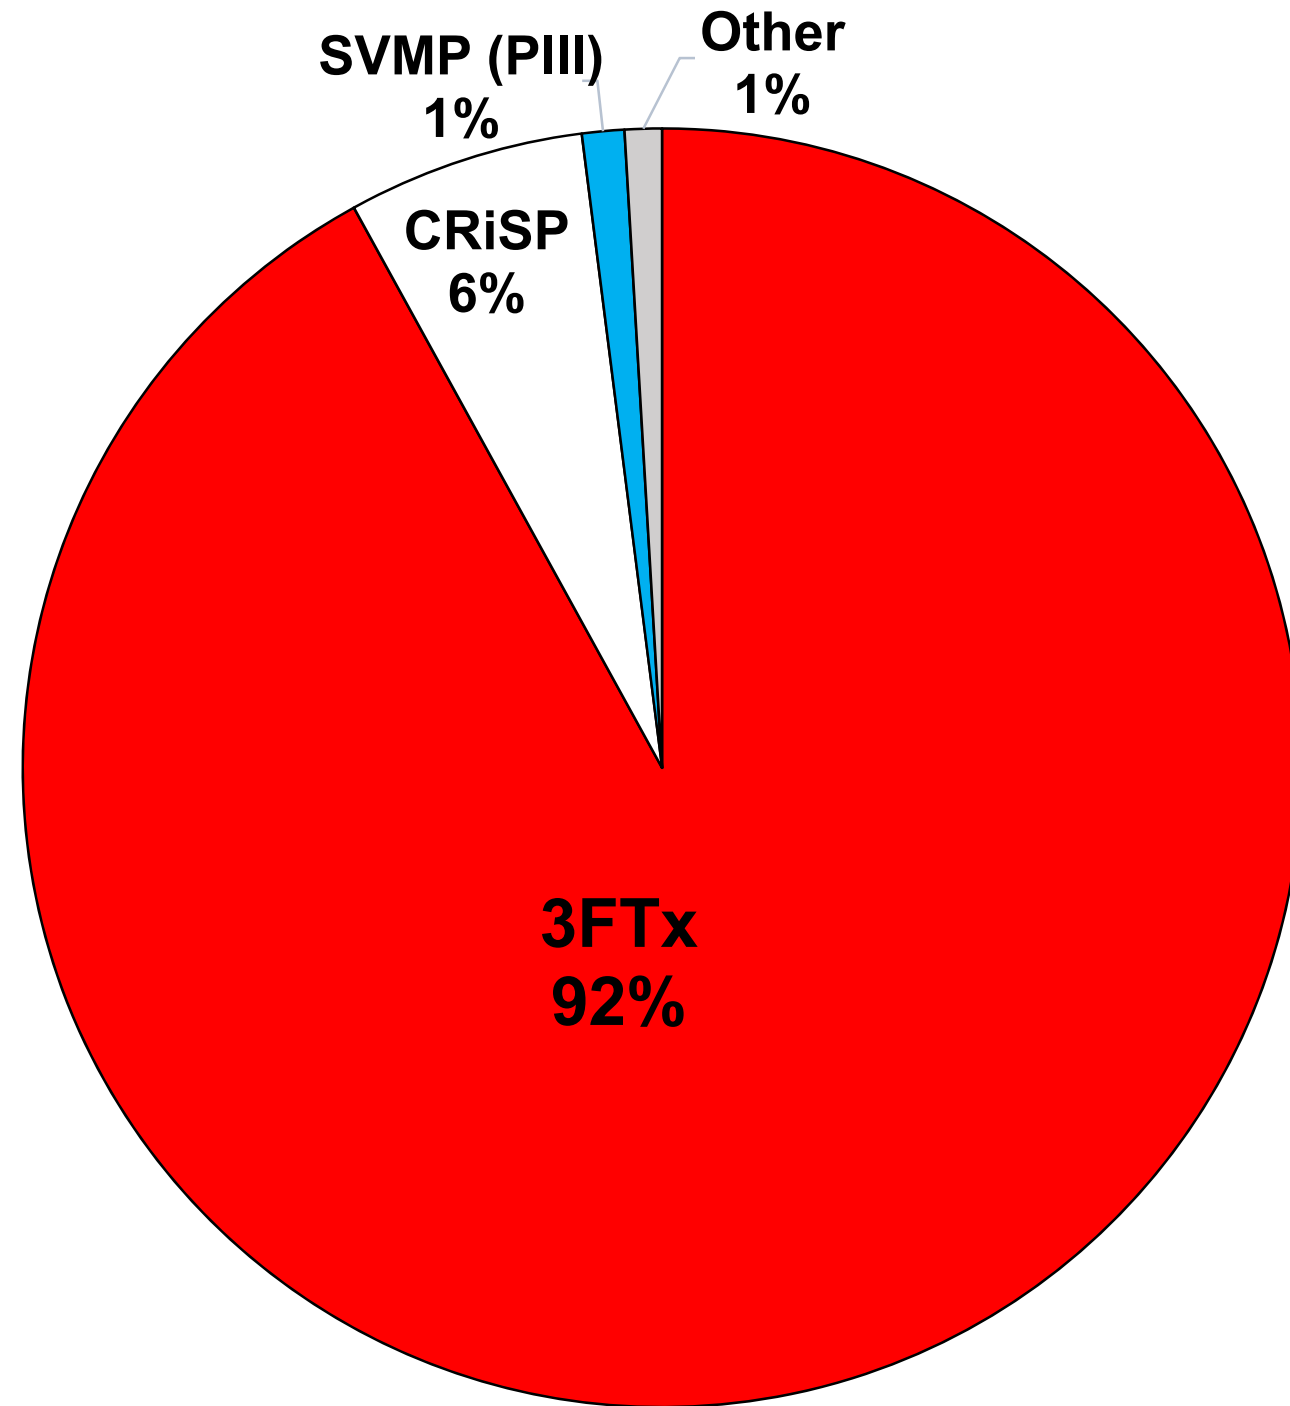

**D**

**Proteome – SE HPLC**

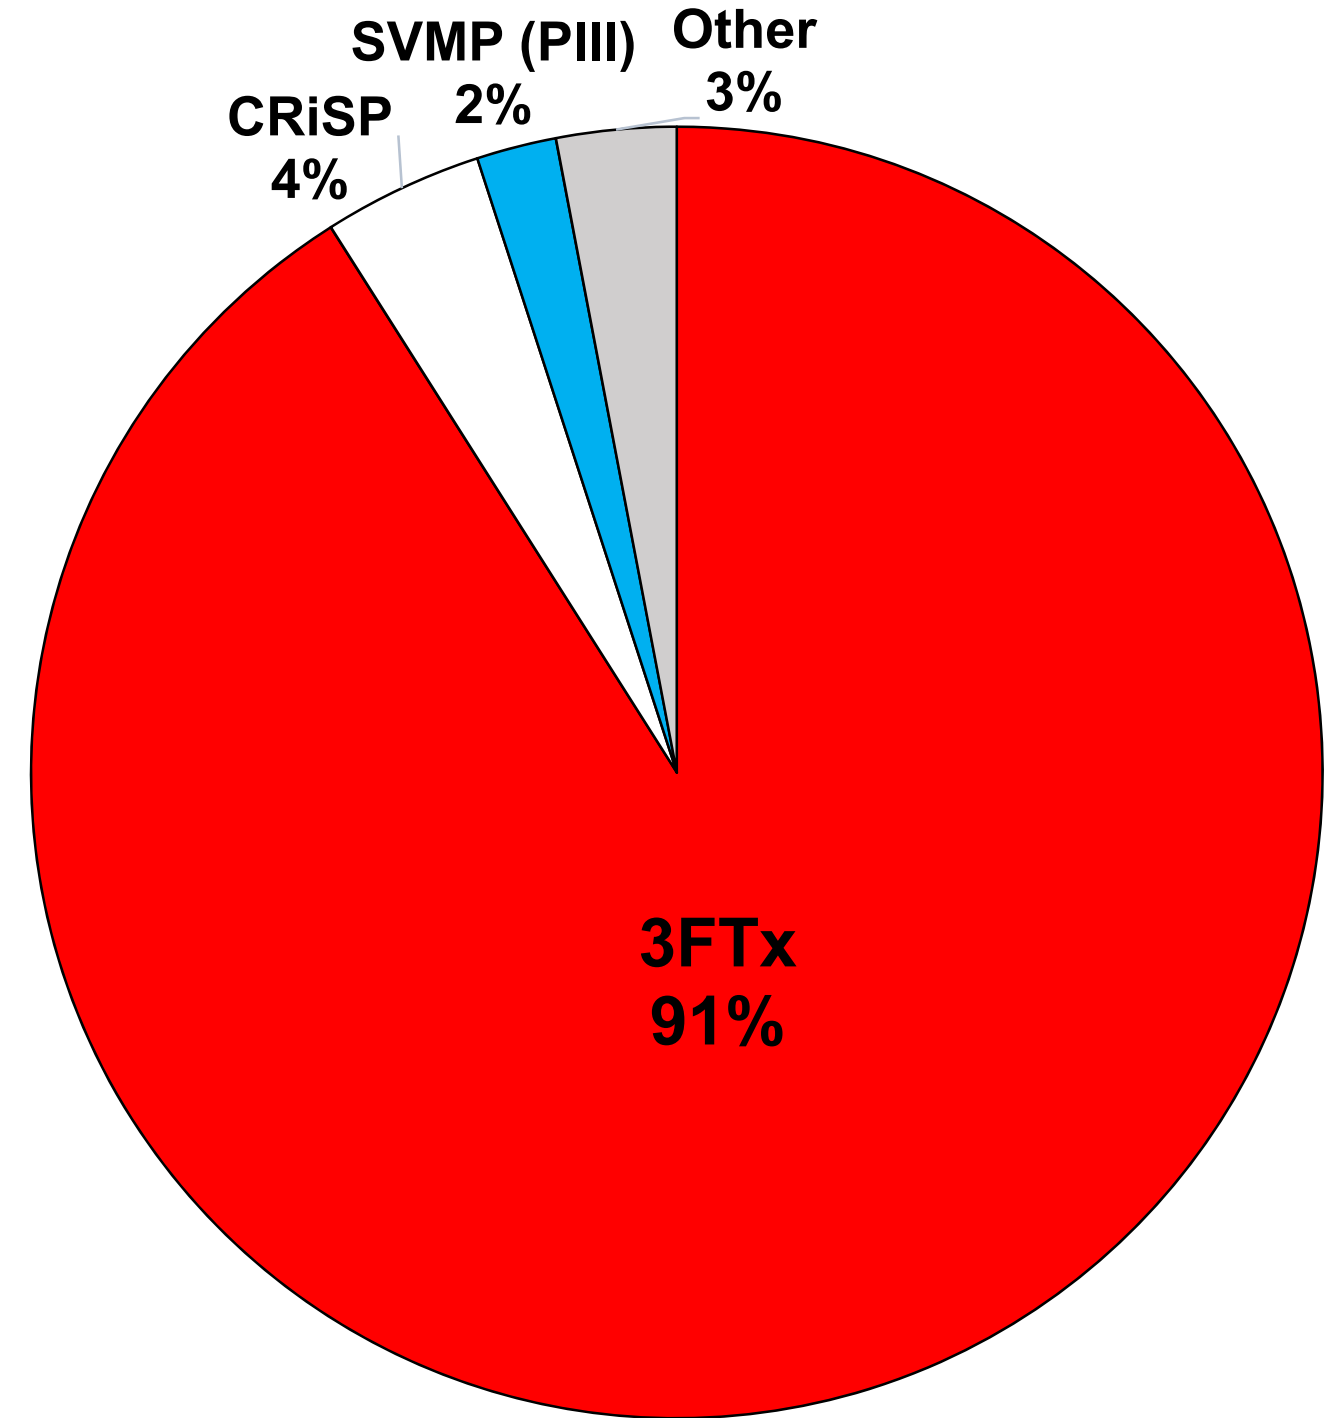

Supplement: rspb20181003supp2.pdf [file rspb20181003supp2.pdf]
